1 **Gut Microbiota Diversity across Ethnicities in the United States**

2 ***Authors:***

3 Andrew W. Brooks<sup>1,2</sup>, Sambhawa Priya<sup>3,4,5</sup>, Ran Blekhman<sup>3,4</sup>, Seth R. Bordenstein<sup>1,2,6,7\*</sup>

4 ***Affiliations:***

5 <sup>1</sup> Vanderbilt Genetics Institute, Vanderbilt University, Nashville, TN, USA.

6 <sup>2</sup> Department of Biological Sciences, Vanderbilt University, Nashville, TN, USA

7 <sup>3</sup>Department of Genetics, Cell Biology, and Development, University of Minnesota,  
8 Minneapolis, MN, USA

9 <sup>4</sup>Department of Ecology, Evolution, and Behavior, University of Minnesota, Minneapolis,  
10 MN, USA

11 <sup>5</sup> Bioinformatics and Computational Biology Program, University of Minnesota,  
12 Minneapolis, MN, USA

13 <sup>6</sup> Department of Pathology, Microbiology, and Immunology, Vanderbilt University,  
14 Nashville, TN, USA.

15 <sup>7</sup>Vanderbilt Institute for Infection, Immunology and Inflammation, Vanderbilt University,  
16 Nashville, TN, USA.

17 \* Corresponding author. E-mail: [s.bordenstein@vanderbilt.edu](mailto:s.bordenstein@vanderbilt.edu) (S.R.B)

18 **Abbreviations:**

19 AGP – American Gut Project

20 ANOSIM – Analysis of Similarity

21 AUC – Area Under the Curve

22 BMI – Body Mass Index

23  $F_{ST}$  – Fixation Index

24 GWAS - Genome-Wide Association Studies

25 HMP – Human Microbiome Project

26 MAF - Minor Allele Frequency

27 OTU – Operational Taxonomic Unit

28 PERMANOVA - Permutational Multivariate Analysis of Variance

29 RF – Random Forest

30 ROC – Receiver Operating Characteristic

31 SMOTE – Synthetic Minority Over-sampling Technique

32 **Abstract:**

33           Composed of hundreds of microbial species, the composition of the human gut  
34 microbiota can vary with chronic diseases underlying health disparities that  
35 disproportionately affect ethnic minorities. However, the influence of ethnicity on the gut  
36 microbiota remains largely unexplored and lacks reproducible generalizations across  
37 studies. By distilling associations between ethnicity and gut microbiota variation in two  
38 American datasets including 1,673 individuals, we report 12 microbial genera and families  
39 that reproducibly vary by ethnicity. Interestingly, a majority of these microbial taxa,  
40 including the most heritable bacterial family, Christensenellaceae, overlap with genetically-  
41 associated lineages and form co-occurring clusters of taxa linked by similar fermentative and  
42 methanogenic metabolic processes. These results demonstrate recurrent associations  
43 between specific taxa in the gut microbiota and ethnicity, providing hypotheses for  
44 examining specific members of the gut microbiota as mediators of health disparities.

45 **Introduction:**

46           The human gut microbiota at fine resolution varies extensively between individuals  
47 (1-3), and this variability frequently associates with diet(4-7), age(6, 8, 9), sex(6, 9, 10), body  
48 mass index (BMI) (1, 6), and diseases presenting as health disparities (11-14). The  
49 overlapping risk factors and burden of many chronic diseases disproportionately affect ethnic  
50 minorities in the United States, yet the underlying biological mechanisms mediating these  
51 substantial disparities largely remain unexplained. Recent evidence is consistent with the  
52 hypothesis that ethnicity associates with microbial abundance, specifically in the oral cavity,  
53 gut, and vagina (15-17). Ethnicity can capture many facets of biological variation including  
54 social, economic and cultural variation as well as aspects of human genetic variation and  
55 biogeographical ancestry (18, 19). Despite the importance of understanding the  
56 interconnections between ethnicity, microbiota, and health disparities, there are no  
57 replicated generalizations about the influence of ethnicity on variation in the gut microbiota  
58 and specific microbial taxa in diverse American populations, even for healthy individuals (6).

59           Here, we comprehensively examine connections between self-declared ethnicity and  
60 gut microbiota variation in more than a thousand individuals sampled by the American Gut  
61 Project (AGP, N=1375) (20) and the Human Microbiome Project (HMP, N=298) (6). Human  
62 genetic diversity in the HMP has been shown to associate with differences in microbiota  
63 composition, and it has been demonstrated that genetic population structure within the HMP  
64 partially delineates self-declared ethnicity (21). Ethnicity was not found to have a significant  
65 association with microbiota composition in a middle-eastern population, however  
66 microbiota influencing factors such as lifestyle and environment across participants was

67 homogenous compared to the ethnic, sociocultural, economic, and dietary diversity found  
68 within the United States (22).

69

## 70 **Results:**

### 71 ***Ethnicity subtly demarcates microbiota***

72 We first evaluate gut microbiota distinguishability between AGP ethnicities (**Fig 1A**,  
73 family taxonomic level, Asians-Pacific Islanders (N=88), Caucasians (N=1237), Hispanics  
74 (N=37), and African Americans (N=13)), sexes (female (N=657), male (N=718)), age groups  
75 (years grouped by decade), and categorical BMI (underweight (N=70), normal (N=873),  
76 overweight (N=318), and obese (N=114)) (Demographic details in **S1 Table**). 97%  
77 Operational Taxonomic Units (OTUs) generated for each dataset are utilized throughout to  
78 maintain consistency with other published literature, however microbial taxonomy of the  
79 HMP is reassigned using the Greengenes reference database (23). While interindividual  
80 microbiota heterogeneity dominates, Analyses of Similarity (ANOSIM) reveal subtle but  
81 significant degrees of total microbiota distinguishability for ethnicity, BMI, and sex, but not  
82 for age (**Fig 1B**, Ethnicity; **Fig 1C**, BMI; **Fig 1D**, Sex; **Fig 1E**, Age) (24). Recognizing that subtle  
83 microbiota distinguishability between ethnicities may be spurious, we independently  
84 replicate the ANOSIM results from HMP African Americans (N=10), Asians (N=34),  
85 Caucasians (N=211) and Hispanics (N=43) (**S2A Table**,  $R=0.065$ ,  $p=0.044$ ), and observe no  
86 significant distinguishability for BMI, sex, and age. Higher rarefaction depths increase  
87 microbiota distinguishability in the AGP across various beta diversity metrics and  
88 categorical factors (**S2B Table**), and significance increases when individuals from  
89 overrepresented ethnicities are subsampled from the average beta diversity distance matrix

90 **(S2C Table)**. Supporting the ANOSIM results, Permutational Multivariate Analysis of  
91 Variance (PERMANOVA) models with four different beta diversity metrics showed that while  
92 all factors had subtle but significant associations with microbiota variation when combined  
93 in a single model, effect sizes were highest for ethnicity in 7 out of 8 comparisons across beta  
94 diversity metrics and rarefaction depths in the AGP and HMP **(S2D Table)**. We additionally  
95 test microbiota distinguishability by measuring the correlation between beta diversity and  
96 ethnicity, BMI, sex, and age with an adapted BioEnv test **(S2E Table)** (25). Similar degrees  
97 of microbiota structuring occur when all factors are incorporated (Spearman Rho=0.055, p-  
98 values: Ethnicity=0.057, BMI<0.001, Sex<0.001, Age=0.564). Firmicutes and Bacteroidetes  
99 dominated the relative phylum abundance, with each representing between 35% and 54%  
100 of the total microbiota across ethnicities **(S1 Fig)**.

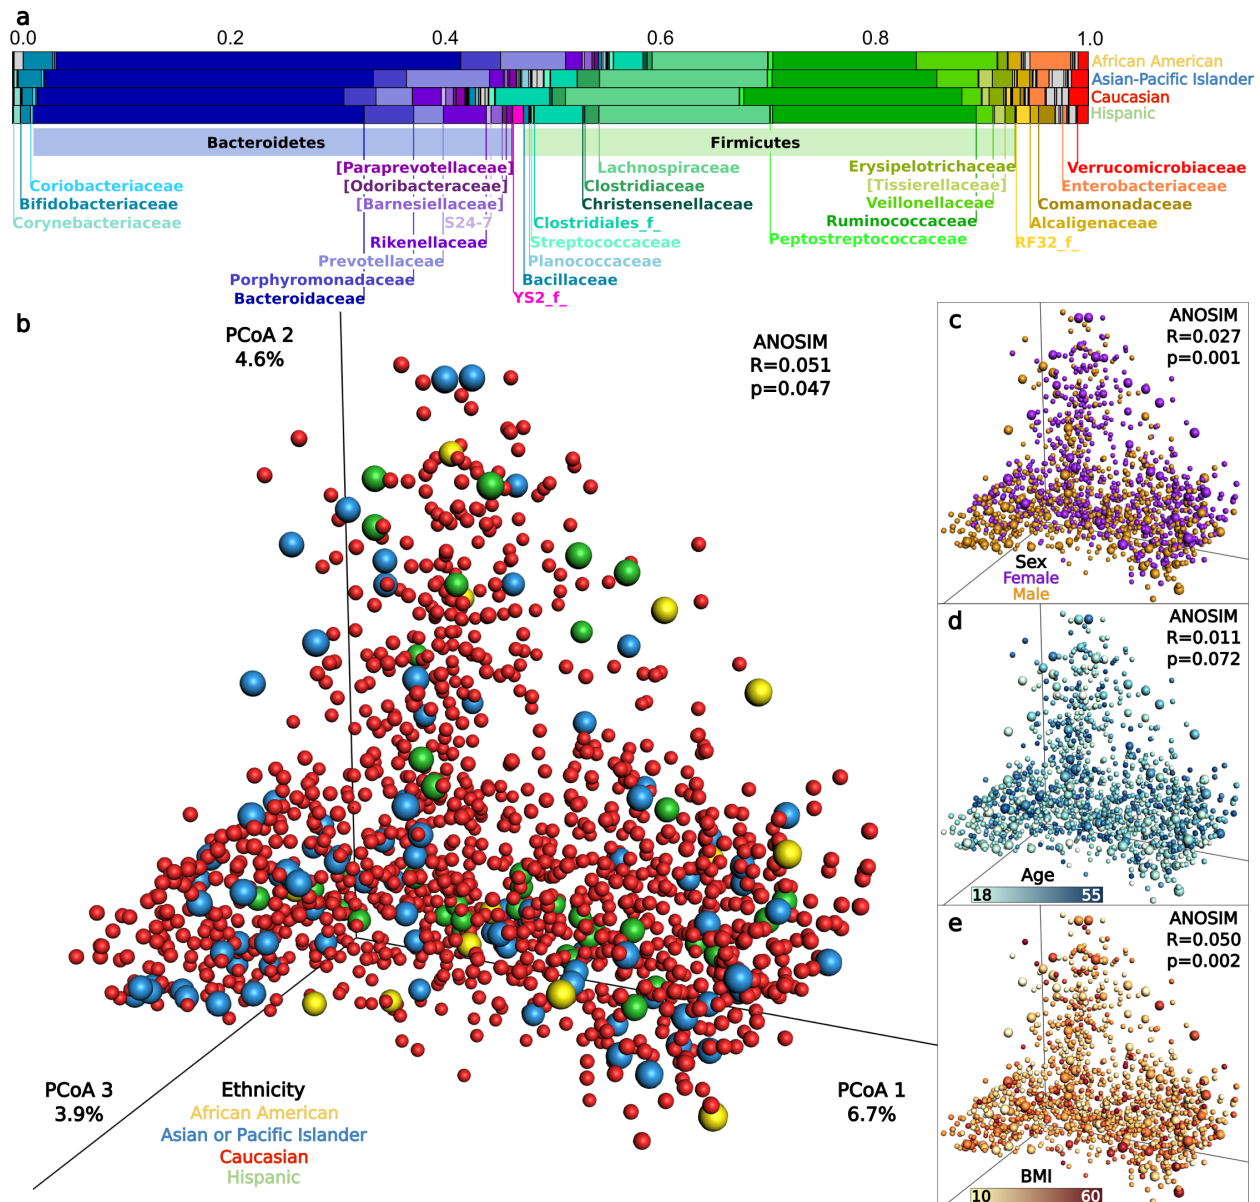

101

102 **Fig 1. Gut microbiota composition and distinguishability by ethnicity, sex, age and**

103 **BMI.** (A) The average relative abundance of dominant microbial families for each ethnicity.

104 (B-E) Principle coordinates analysis plots of microbiota Bray-Curtis beta diversity and

105 ANOSIM distinguishability for: (B) Ethnicity, (C) Sex, (D) Age, (E) BMI. In B-E, each point

106 represents the microbiota of a single sample, and colors reflect metadata of that individual.

107 Caucasian points are reduced in size to allow clearer visualization.

108

109           We next test for ethnicity signatures in the gut microbiota by analyzing alpha and beta  
110 diversity, abundance and ubiquity distributions, distinguishability, and classification  
111 accuracy (26). Shannon's Alpha Diversity Index (27), which weights both microbial  
112 community richness (Observed OTUs) and evenness (Equitability), significantly varies  
113 across ethnicities in the AGP dataset (Kruskal Wallis,  $p=2.8e-8$ ) with the following ranks:  
114 Hispanics > Caucasians > Asian-Pacific Islanders > African Americans (**Fig 2A**). Some of these  
115 results replicate in the HMP dataset, where we find a significantly lower Shannon diversity  
116 for Asian-Pacific Islanders relative to Caucasians, and a trend of lower Shannon diversity for  
117 Asian-Pacific Islanders relative to Hispanics. Five alpha diversity metrics, two rarefaction  
118 depths, and separate analyses of Observed OTUs and Equitability generally confirm the  
119 results (**S3A Table**).



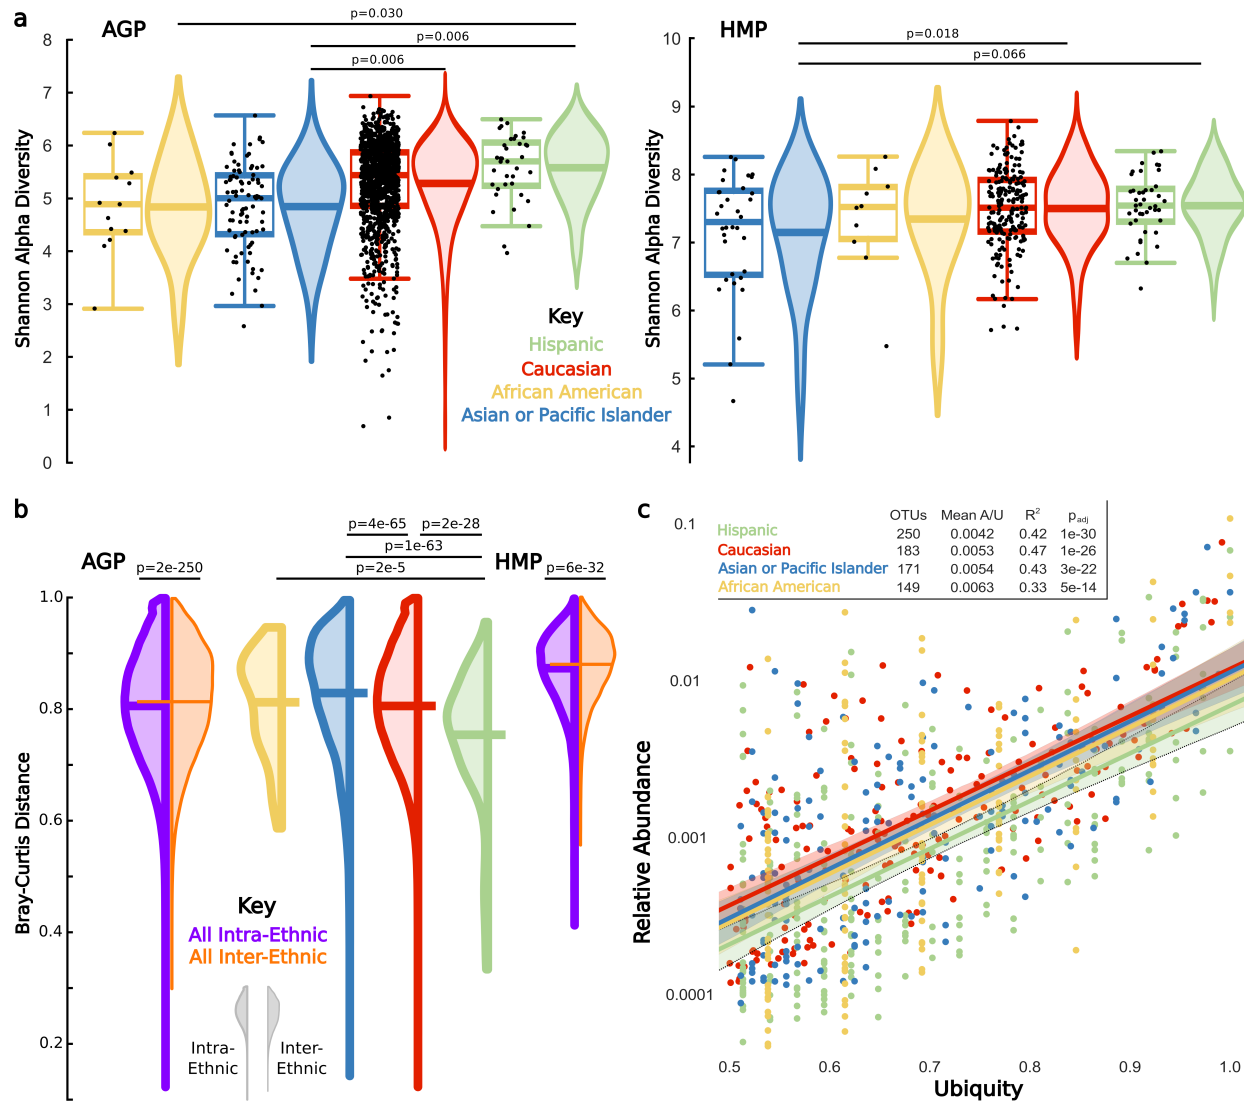

120

121 **Fig 2. Ethnicity associates with diversity and composition of the gut microbiota. (A)**

122 Center lines of each boxplot depict the median by which ethnicities were ranked from low

123 (left) to high (right); the lower and upper end of each box represent the 25th and 75th

124 quartiles respectively; whiskers denote the 1.5 interquartile range, and black dots represent

125 individual samples. Lines in the middle of violin plots depict the mean, and p-values are

126 Bonferroni corrected within each dataset. (B) Left extending violin plots represent intra-

127 ethnic distances for each ethnicity, and right extending violin plots depict all inter-ethnic

128 distances. Center lines depict the mean beta diversity. Significance bars above violin plots

129 depict Bonferroni corrected pairwise Mann-Whitney-U comparisons of the intra-intra- and  
130 intra-inter-ethnic distances. (C) Within each ethnicity, OTUs shared by at least 50% of  
131 samples. Colored lines represent a robust ordinary least squares regression within OTUs of  
132 each ethnicity, shaded regions represent the 95% confidence interval,  $R^2$  denotes the  
133 regression correlation, the OTUs column indicates the number of OTUs with >50% ubiquity  
134 for that ethnicity, Mean A/U is the average abundance/ubiquity ratio, and the  $p_{adj}$  is the  
135 regression significance adjusted and Bonferroni corrected for the number of ethnicities.

136

137 If ethnicity impacts microbiota composition, pairwise beta diversity distances  
138 (ranging from 0/completely dissimilar to 1/identical) will be greater between ethnicities  
139 than within ethnicities. While average gut microbiota beta diversities across all individuals  
140 are high (**Fig 2B**, Bray-Curtis=0.808), beta diversities between individuals of the same  
141 ethnicity (intra-ethnic, Bray-Curtis=0.806) are subtly, but significantly, lower than those  
142 between ethnicities in both the AGP (inter-ethnic, Bray-Curtis=0.814) and HMP datasets  
143 (intra-ethnic, Bray-Curtis=0.870 versus inter-ethnic, Bray-Curtis=0.877). We confirm AGP  
144 results by subsampling individuals from overrepresented ethnicities across beta metrics and  
145 rarefaction depths (**S4A-4B Tables**). Finally, we repeat analyses across beta metrics and  
146 rarefaction depths using only the average distance of each individual to all individuals from  
147 the ethnicity to which they are compared (**S4C-4D Tables**).

148 Next, we explore inter-ethnic variation in the number of OTUs shared in at least 50%  
149 of individuals within an ethnicity. Out of 5,591 OTUs in the total AGP dataset, 101 (1.8%)  
150 meet this ubiquity cutoff in all ethnicities, and 293 (5.2%) unique OTUs meet the cutoff  
151 within at least one ethnicity. Hispanics share the most ubiquitous OTUs and have the lowest

152 average abundance/ubiquity (A/U) ratio (**Fig 2C**), indicating higher stability of lower  
153 abundance shared OTUs (28). This result potentially explains their significantly lower intra-  
154 ethnic beta diversity distance and thus higher microbial community overlap relative to the  
155 other ethnicities (**Fig 2B**). Comparisons in the AGP between the higher sampled Hispanic,  
156 Caucasian, and Asian-Pacific Islander ethnicities also reveal a trend wherein higher intra-  
157 ethnic community overlap (**Fig 2B**) parallels higher numbers of ubiquitous OTUs (**Fig 2C**),  
158 higher Shannon Alpha diversity (**Fig 2A**), and higher stability of ubiquitous OTUs as  
159 measured by the abundance/ubiquity (A/U) ratio (**Fig 2C**).

160 We next assess whether a single ethnicity disproportionately impacts total gut  
161 microbiota distinguishability in the AGP by comparing ANOSIM results from the consensus  
162 beta diversity distance matrix when each ethnicity is sequentially removed from the analysis  
163 (**Fig 3A** and **S2E Table**). Distinguishability remains unchanged when the few African  
164 Americans are removed, but is lost upon removal of Asian-Pacific Islanders or Caucasians  
165 (**Fig 3A**). Notably, removal of Hispanics increases distinguishability among the remaining  
166 ethnicities, which may be due to higher degree of beta diversity overlap observed between  
167 Hispanics and other ethnicities (**S4B Table**). Results conform across rarefaction depths and  
168 beta diversity metrics (**S2F Table**), and pairwise combinations show strong  
169 distinguishability between African Americans and Hispanics (ANOSIM,  $R=0.234$ ,  $p=0.005$ ),  
170 and Asian-Pacific Islanders and Caucasians (ANOSIM,  $R=0.157$ ,  $p<0.001$ ).

171 Finally, to complement evaluation with ecological alpha and beta diversity we  
172 implement a random forest supervised learning algorithm to classify gut microbiota from  
173 genus level community profiles into their respective ethnicity. We build four one-versus-all  
174 binary classifiers to classify samples from each ethnicity compared to the rest, and use two

175 different sampling approaches to train the models, Synthetic Minority Over-sampling  
 176 Technique (SMOTE) (29) and down-sampling, for overcoming uneven representation of  
 177 ethnicities in both the datasets (see Methods). Given that the area under the receiver  
 178 operating characteristic (ROC) curve (or AUC) of a random guessing classifier is 0.5, the  
 179 models classify each ethnicity fairly well (**Fig 3B**) with average AUCs across sampling  
 180 techniques and datasets of 0.78 for Asian-Pacific Islanders, 0.76 for African Americans, 0.69  
 181 for Hispanics, and 0.70 for Caucasians.

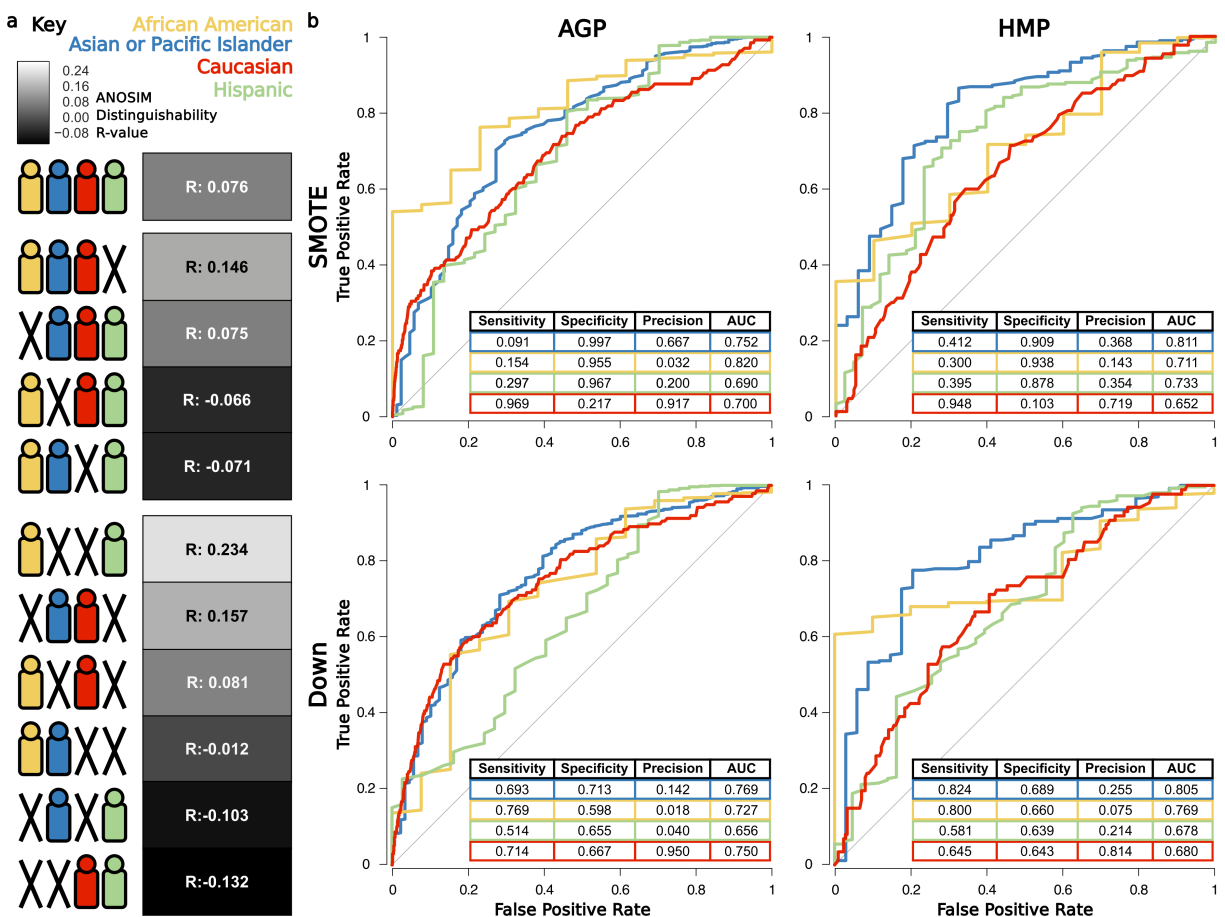

182

183 **Fig 3. Microbiota distinguishability and classification ability across ethnicities.** (A)

184 ANOSIM distinguishability between all combinations of ethnicities. Symbols depict specific

185 ethnicities included in the ANOSIM tests, and boxes denote the R-value as a heatmap, where

186 white indicates increasing and black indicates decreasing distinguishability relative to the R-  
187 value with all ethnicities. (B) Average ROC curves (for 10-fold cross-validation) and  
188 prediction performance metrics for one-versus-all random forest classifiers for each  
189 ethnicity, using SMOTE (29) and down subsampling approaches for training.

190

### 191 ***Recurrent taxa associations with ethnicity***

192 Subtle to moderate ethnicity-associated variation in microbial communities may in  
193 part be strongly driven by differential abundance of certain microbial lineages. We find that  
194 16.2% (130/802) of the AGP taxa and 20.6% (45/218) of HMP taxa across all classification  
195 levels (i.e. phylum to genus, **S5 Table**) significantly vary in abundance across ethnicities  
196 (Kruskal-Wallis,  $p_{FDR} < 0.05$ ). Between datasets, 19.2% (25/130) of the AGP and 55.6%  
197 (25/45) of the HMP varying lineages replicate in the other dataset, representing a  
198 significantly greater degree of overlap than would be expected by chance (AGP replicated,  
199 Fisher's exact one-tailed test, expected 5% overlap (7 overlapping vs. 123 not overlapping)  
200 and observed (25 overlapping vs. 105 not overlapping),  $p = 5.26e-4$ ; HMP replicated, Fisher's  
201 exact test, expected 5% overlap (2 overlapping vs. 43 not overlapping) and observed (25  
202 overlapping vs. 20 not overlapping),  $p = 4.72e-8$ ; ethnic permutation analysis of overlap,  
203  $p < 0.001$  each taxonomic level and all taxonomic levels combined). The highest replication of  
204 taxonomic lineages varying by abundance occurs with 22.0% (9/41) of families across  
205 datasets, followed by genus with 13.4% (9/67).

206 Among 18 reproducible lineages, we categorize 12 as unique (**Fig 4**) and exclude 6  
207 where nearly identical abundance profiles between family/genus taxonomy overlap.  
208 Comparing relative abundance differences between pairs of ethnicities for these 12 taxa in

209 AGP and HMP reveals 20 out of 30 significant ( $p < 0.05$ , Mann-Whitney-U) differences  
210 replicated. Intriguingly, all reproducible pairwise differences are a result of decreases in  
211 Asian-Pacific Islanders (**Fig 4**).

212 We also test taxon abundance and presence/absence associations with ethnicity  
213 separately in the AGP using linear and logistic regression models respectively, and we repeat  
214 the analysis while incorporating categorical sex and continuous age and BMI as covariates  
215 (**S6 Table**). Clustering microbial families based on their abundance correlation reveals two  
216 co-occurrence clusters: (i) a distinct cluster of six Firmicutes and Tenericutes families in the  
217 HMP and (ii) an overlapping but more diverse cluster of 20 families in the AGP (**S2 Fig**). Nine  
218 of the 12 taxa found to recurrently vary in abundance across ethnicities are represented in  
219 these clusters (**Fig 4**), with four appearing within both clusters, and the other five appearing  
220 either within or closely correlated with members of both clusters (**S2 Fig**). Further, 90%  
221 (18/20) of families in the AGP cluster and 66% (4/6) of taxa in the HMP cluster significantly  
222 vary in abundance across ethnicities. Taken together, these results establish general overlap  
223 of the most significantly ethnically-associated taxa between the three methods,  
224 reproducibility of microbial abundances that vary between ethnicities across datasets, and  
225 patterns of co-occurrence among these taxa which could suggest they are functionally linked.

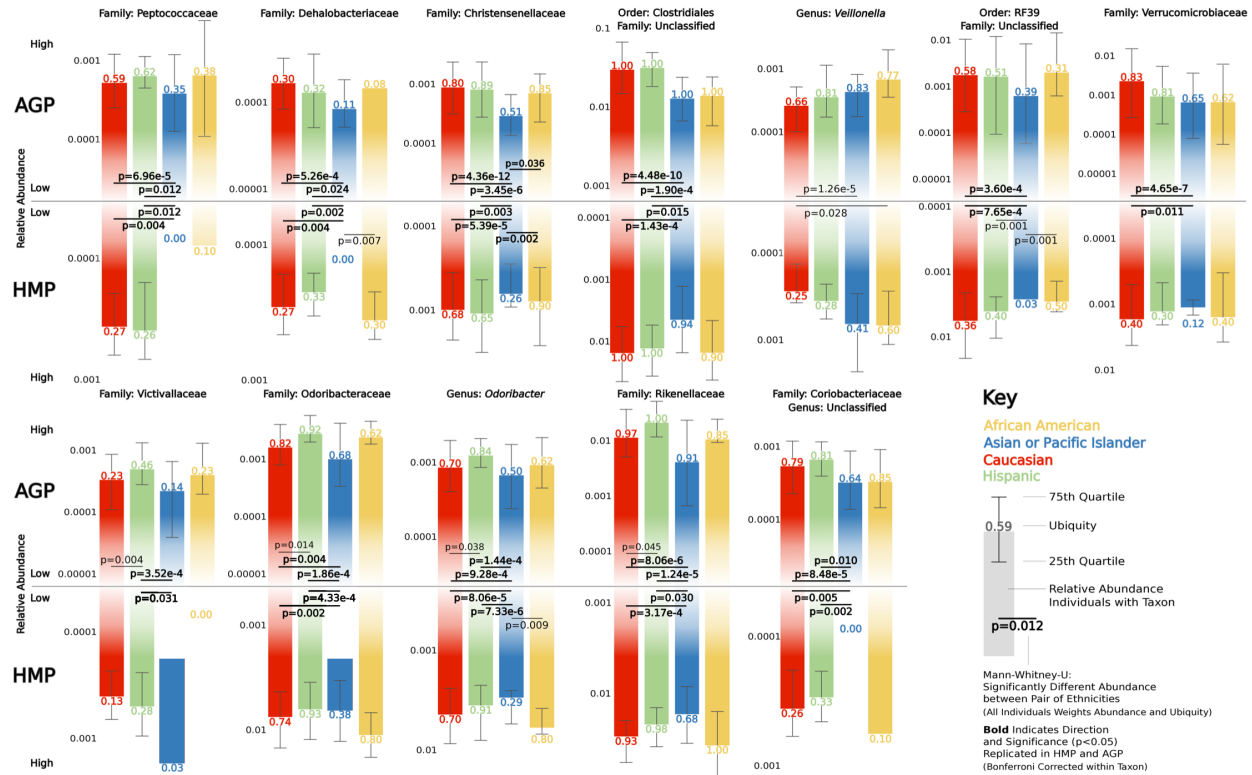

226

227 **Fig 4. Ethnicity-associated taxa match between the HMP and AGP.** Barplots depict the  
 228 log<sub>10</sub> transformed relative abundance for individuals possessing the respective taxon within  
 229 each ethnicity, ubiquity appears above (AGP) or below (HMP) bars, and the 25<sup>th</sup> and 75<sup>th</sup>  
 230 percentiles are shown with extending whiskers. Mann-Whitney-U tests evaluate differences  
 231 in abundance and ubiquity for all individuals between pairs of ethnicities; for example, the  
 232 direction of change in Victivallaceae is driven by ubiquity while abundance is higher for  
 233 those possessing the taxon. Significance values are Bonferroni corrected for the six tests  
 234 within each taxon and dataset, and bold p-values indicate that significance ( $p < 0.05$ ) and  
 235 direction of change replicate in the AGP and HMP.

236

237 ***Most heritable taxon varies by ethnicity***

238 Identified as the most heritable human gut taxon (30, 31), the family  
239 Christensenellaceae exhibits the second strongest significant differences in abundance  
240 across ethnicities in both AGP and HMP datasets (**S5 Table**, Family: AGP, Kruskal-Wallis,  
241  $p_{FDR}=1.55e-9$ ; HMP, Kruskal-Wallis,  $p_{FDR}=0.0019$ ). Additionally, Christensenellaceae is  
242 variable by sex and BMI (AGP: Sex, Kruskal-Wallis,  $p_{FDR}=1.22e-12$ ; BMI, Kruskal-Wallis,  
243  $p_{FDR}=0.0020$ ), and represents some of the strongest pairwise correlations with other taxa in  
244 both co-occurrence clusters (**S2 Fig**). There is at least an eight-fold and two-fold reduction  
245 in average Christensenellaceae abundance in Asian-Pacific Islanders relative to the other  
246 ethnicities in the AGP and HMP respectively (**S5 Table**), and significance of all pairwise  
247 comparisons in both datasets show reduced abundance in Asian-Pacific Islanders (**Fig 4**).  
248 Abundance in individuals possessing Christensenellaceae and presence/absence across all  
249 individuals significantly associate with ethnicity (**S6 Table**, Abundance, Linear Regression,  
250  $p_{Bonferroni}=0.006$ ; Presence/Absence, Logistic Regression,  $p_{Bonferroni}=8.802e-6$ ), but there was  
251 only a slight correlation between the taxon's relative abundance and BMI (**S3 Fig**).  
252 Confirming previous associations with lower BMI(32), we observe that AGP individuals with  
253 Christensenellaceae also have a significantly lower BMI (Mean BMI,  $23.7\pm 4.3$ ) than  
254 individuals without it (Mean BMI,  $25.0\pm 5.9$ ; Mann-Whitney-U,  $p<0.001$ ). This pattern is  
255 separately reflected in African Americans, Asian-Pacific Islanders, and Caucasians but not  
256 Hispanics (**Fig 5**), suggesting that each ethnicity may have different equilibria between the  
257 taxon's abundance and body weight.



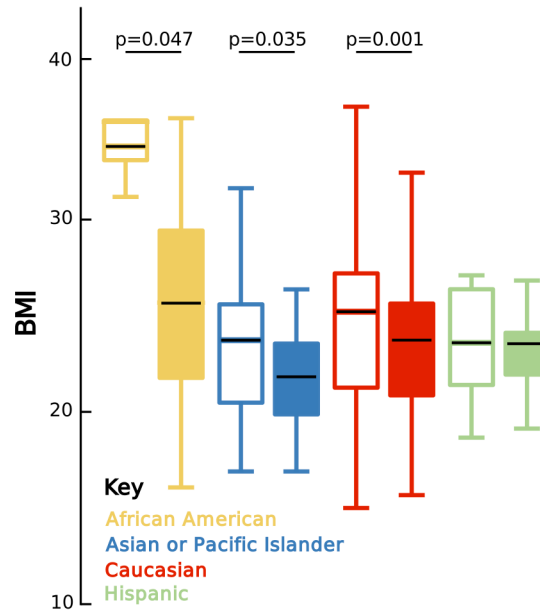

258

259 **Fig 5. Christensenellaceae variably associates with BMI across ethnicities.** Boxplots of

260 BMI for individuals without (unfilled boxplots) and with (filled boxplots)

261 Christensenellaceae. Significance was determined using one-tailed Mann-Whitney-U tests

262 for lower continuous BMI values. Black lines indicate the mean relative abundance; the lower

263 and upper end of each box represent the 25<sup>th</sup> and 75<sup>th</sup> quartiles respectively; and whiskers

264 denote the 1.5 interquartile range.

265

### 266 *Genetic- and ethnicity-associated taxa overlap*

267 Many factors associate with human ethnicity, including a small subset of population

268 specific genetic variants (estimated ~0.5% genome wide) that vary by biogeographical

269 ancestry (33, 34), and self-declared ethnicity in the HMP is delineated by population genetic

270 structure (21). Here we investigate whether ethnicity-associated taxa overlap with (i) taxa

271 that have a significant population genetic heritability in humans (30, 31, 35, 36) and (ii) taxa

272 linked with human genetic variants in two large Genome-Wide Association Studies (GWAS)-

273 microbiota analyses (31, 36). All except one recurrent ethnicity-associated taxa are heritable  
 274 in at least one study, with seven replicating in three or more studies (**Table 1**). Likewise,  
 275 abundance variation in seven recurrent ethnicity-associated taxa demonstrate significant  
 276 GWAS associations with at least one variant in the human genome, therefore we assess  
 277 whether any genetic variants associated with differences in microbial abundance show  
 278 significant rates of differentiation ( $F_{ST}$ ) between 1,000 genomes superpopulations (34). Out  
 279 of 49 variants associated with ethnically varying taxa, 21 have higher  $F_{ST}$  values between at  
 280 least one pair of populations than that of 95% of other variants on the same chromosome  
 281 and across the genome, and the  $F_{ST}$  values of five variants associated with Clostridiaceae  
 282 abundance rank above the top 99% (**S7 Table**). Since taxa that vary across ethnicities exhibit  
 283 lower abundance in Asian-Pacific Islanders, it is notable that the  $F_{ST}$  values of 18 and 11  
 284 variant comparisons for East Asian and South Asian populations, respectively, are above that  
 285 of the 95% rate of differentiation threshold from African, American, or European  
 286 populations. Critically, the microbiota and 1,000 genomes datasets are not drawn from the  
 287 same individuals, and disentangling the role of genetic from social and environmental factors  
 288 will still require more controlled studies.  
 289

| Recurrent Ethnicity-Associated Taxa        | Heritability                                                    | Genetic Associations                                                          |
|--------------------------------------------|-----------------------------------------------------------------|-------------------------------------------------------------------------------|
| Family: Peptococcaceae                     | 0.1213 <sup>A</sup> , 0.2154 <sup>C</sup> , 0.26 <sup>E</sup>   | rs143179968 <sup>E</sup>                                                      |
| Family: Dehalobacteriaceae                 | 0.6878 <sup>B</sup> , 0.3087 <sup>C</sup>                       |                                                                               |
| Family: Christensenellaceae                | 0.3819 <sup>A</sup> , 0.6170 <sup>B</sup> , 0.4230 <sup>C</sup> |                                                                               |
| Order: Clostridiales, Family: Unclassified | 0.2914 <sup>A</sup> , 0.4020 <sup>B</sup> , 0.1330 <sup>C</sup> | *40 Genetic Variants <sup>C</sup>                                             |
| Genus: <i>Veillonella</i>                  | 0.1370 <sup>A</sup> , 0.2168 <sup>D</sup>                       | rs347941 <sup>C</sup>                                                         |
| Order: RF39, Family: Unclassified          | 0.2341 <sup>A</sup> , 0.6618 <sup>B</sup> , 0.3074 <sup>C</sup> | rs4883972 <sup>C</sup>                                                        |
| Family: Verrucomicrobiaceae                | 0.1257 <sup>A</sup> , 0.5973 <sup>B</sup> , 0.1394 <sup>C</sup> |                                                                               |
| Family: Victivallaceae                     |                                                                 |                                                                               |
| Family Odoribacteraceae                    | 0.1389 <sup>A</sup> , 0.1917 <sup>D</sup> , 0.34 <sup>E</sup>   | chr7:96414393 <sup>E</sup> , rs115795847 <sup>E</sup>                         |
| Genus: <i>Odoribacter</i>                  | 0.1916 <sup>D</sup>                                             |                                                                               |
| Family: Rikenellaceae                      | 0.1299 <sup>D</sup> , 0.29 <sup>E</sup>                         | rs17098734 <sup>C</sup> , rs3909540 <sup>C</sup> , rs147600757 <sup>E</sup> , |
| Family: Coriobacteraceae, Genus:           | 0.1364 <sup>A</sup> , 0.2822 <sup>B</sup> , 0.1609 <sup>C</sup> | rs9357092 <sup>E</sup>                                                        |

290

291 **Table 1. Recurrent ethnicity-associated taxa overlap heritable and genetically-**  
292 **associated taxa.** The table shows population genetic heritability estimates and associated  
293 genetic variants for the 12 recurrent ethnically varying taxa. The minimum heritability cutoff  
294 was chosen as >0.1, and only exactly overlapping taxonomies were considered. Studies  
295 examined: <sup>A</sup>UKTwins (2014, A in ACE model) (30), <sup>B</sup>Yatsunenکو (2014, A in ACE model) (30),  
296 <sup>C</sup>UKTwins (2016, A in ACE model) (31), <sup>D</sup>Lim (2016, H2r in SOLAR (37)) (35), <sup>E</sup>Turpin (2016,  
297 H2r in SOLAR (37)). \*indicates excessive variants were excluded from table.

298

### 299 **Discussion:**

300 Many common diseases associate with microbiota composition and ethnicity, raising  
301 the central hypothesis that microbiota variation between ethnicities can occasionally serve  
302 as a mediator of health disparities. American's self-declared ethnicity can capture  
303 socioeconomic, cultural, geographic, dietary and genetic diversity, and a similarly complex  
304 array of interindividual and environmental factors influence total microbiota composition,  
305 resulting in challenges when trying to consistently recover variation in total gut microbiota  
306 between ethnicities. These challenges inform the importance of reproducibility, both  
307 through confirmation across analytical methods and replication across study populations. In  
308 order to more fully evaluate this hypothesis, baseline generalizations are drawn here about  
309 the impact of ethnicity on gut microbiota variation in healthy individuals, and is concordant  
310 with recent literature in single populations suggesting that ethnicity plays a subtle but  
311 reproducible role in microbiota assembly (15-17, 21, 22).

312 Whether shaped through socioeconomic, dietary, healthcare, genetic, or other  
313 ethnicity-related factors, the replicated, varying taxa represent sources for novel hypotheses

314 addressing health disparities. For instance, the family Odoribacteraceae and genus  
315 *Odoribacter* are primary butyrate producers in the gut, and have been negatively linked to  
316 severe forms of Crohn's disease and Ulcerative Colitis in association with reduced butyrate  
317 metabolism (38-40). Asian-Pacific Islanders possess significantly less Odoribacteraceae and  
318 *Odoribacter* than Hispanics and Caucasians in both datasets, and severity of Ulcerative Colitis  
319 upon hospital admission has been shown to be significantly higher in Asian Americans (41).  
320 Considering broader physiological roles, several ethnicity-associated taxa are primary gut  
321 anaerobic fermenters and methanogens (42, 43), and associate with lower BMI and blood  
322 triglyceride levels (32, 44). Indeed, Christensenellaceae, Odoribacteraceae, *Odoribacter*, and  
323 the class Mollicutes containing RF39 negatively associate with metabolic syndrome and  
324 demonstrate significant population heritability in twins (35). Implications for health  
325 outcomes warrant further investigation, but could be reflected by positive correlations of  
326 Odoribacteraceae, *Odoribacter*, Coriobacteriaceae, Christensenellaceae, and the dominant  
327 Verrucomicrobiaceae lineage *Akkermansia* with old age (45, 46). Moreover, these findings  
328 raise the importance of controlling for ethnicity in studies linking microbiota variation to  
329 disease because associations between specific microbes and a disease could be confounded  
330 by ethnicity of the study subjects.

331         Based on correlations in individual taxon's abundance, a similar pattern of co-  
332 occurrence previously identified as the Christensenellaceae 'consortium' includes 11 of the  
333 12 recurrent ethnically varying taxa (30), and members of this consortium associate with  
334 genetic variation in the human formate oxidation gene *ALDH1L1* which is a genetic risk factor  
335 for stroke (31, 47, 48). Formate metabolism is a key step in the pathway reducing carbon  
336 dioxide to methane (49, 50), and increased methane associates with increased Rikenellaceae,

337 Christensenellaceae, Odoribacteraceae and *Odoribacter* (51). Products of methanogenic  
338 fermentation pathways include short chain fatty acids such as butyrate, which through  
339 reduction of pro-inflammatory cytokines has been linked to cancer cell apoptosis and  
340 reduced risk of colorectal cancer (52, 53). Asian Americans are the only ethnic group where  
341 cancer surpasses heart disease as the leading cause of death, and over 70% of Asian  
342 Americans were born overseas, which can affect assimilation into western lifestyles, leading  
343 to reduced access to healthcare and screening, and proper medical education (52, 54-56).  
344 Indeed, as countries in Asia shift toward a more western lifestyle, the incidence of cancers,  
345 particularly gastrointestinal and colorectal cancers, are increasing rapidly, possibly  
346 indicating incompatibilities between traditionally harbored microbiota and western  
347 lifestyles (57-60). Asian Americans have higher rates of type 2 diabetes and pathogenic  
348 infections than Caucasians (61), and two metagenomic functions enriched in control versus  
349 type 2 diabetes cases appear to be largely conferred by cluster-associated butyrate-  
350 producing and motility-inducing Verrucomicrobiaceae and Clostridia lineages reduced in  
351 abundance among AGP and HMP Asian-Pacific Islanders (11). Both induction of cell motility  
352 and butyrate promotion of mucin integrity can protect against pathogenic colonization and  
353 associate with microbial community changes (11, 53, 62). Levels of cell motility and butyrate  
354 are key factors suspected to underlie a range of health disparities including inflammatory  
355 bowel disease, arthritis, and type 2 diabetes (11, 63-65). Patterns of ethnically varying taxa  
356 across ethnicities could result from many factors including varying diets, environmental  
357 exposures, sociocultural influences, human genetic variation and others. However,  
358 regardless of the mechanisms dictating assembly, these results suggest there is a

359 reproducible, co-occurring group of taxa linked by similar metabolic processes known to  
360 promote homeostasis.

361         The utility of this work is establishing a framework for studying ethnicity-associated  
362 taxa and hypotheses of how changes in abundance or presence of these taxa may or may not  
363 shape health disparities, many of which also have genetic components. Differing in allele  
364 frequency across three population comparisons and associated with the abundance of  
365 Clostridiales, the genetic variant rs7587067 has a significantly higher frequency in African  
366 (Minor Allele Frequency (MAF)=0.802) versus East Asian (MAF=0.190,  $F_{ST}$ =0.54,  
367 Chromosome=98.7%, Genome-Wide=98.9%), admixed American (MAF=0.278,  $F_{ST}$ =0.44,  
368 Chromosome=99.0%, Genome-Wide=99.1%), and European populations (MAF=0.267,  
369  $F_{ST}$ =0.45, Chromosome=98.7.3%, Genome-Wide=98.7%). This intronic variant for the gene  
370 *HECW2* is a known eQTL (GTEx, eQTL Effect Size=-0.18,  $p=7.4e-5$ ) (66, 67), and *HECW2*  
371 encodes a ubiquitin ligase linked to enteric gastrointestinal nervous system function through  
372 maintenance of endothelial lining of blood vessels (68, 69). Knockout of *HECW2* in mice  
373 reduced enteric neuron networks and gut motility, and patients with Hirschsprung's disease  
374 have diminished localization of *HECW2* to regions affected by loss of neurons and colon  
375 blockage when compared to other regions of their own colon and healthy individuals (70).  
376 Hirschsprung's disease presenting as full colon blockage is rare and has not undergone  
377 targeted examination as a health disparity, however a possible hypothesis is that lower  
378 penetrance of the disease in individuals with the risk allele at rs7587067 could lead to  
379 subtler effects on gut motility resulting in Clostridiales abundance variation.

380         Another example is that the abundance of Rikenellaceae in the gut is strongly and  
381 reproducibly associated with variant rs621711178, which was identified as an eQTL for gene

382 *PHOSPHO2* within human gut tissue (36, 67). The primary substrate of the protein encoded  
383 by *PHOSPHO2* is vitamin B6 (71), which shows increased deficiencies in germ free compared  
384 to conventionally reared rats (72). Interestingly, microbial vitamin B6 biosynthesis and  
385 salvage was the best predictor of chronic fatigue and irritable bowel syndromes (73, 74).  
386 Despite the intrigue of connecting the human genome, microbiota and disease phenotypes,  
387 evaluating these hypotheses will require more holistic approaches such as incorporating  
388 metagenomics and metabolomics to identify whether enzymes or metabolic functions  
389 reproducibly vary across ethnicities, as well as direct functional studies in model systems to  
390 understand if correlation is truly driven by causation.

391 Further limitations should also be considered, including recruitment biases for the  
392 AGP versus HMP, variation in sample processing and OTU clustering, and uneven sampling  
393 which could only be addressed with down sampling of over-represented ethnicities. Still,  
394 despite these confounders care was taken to demonstrate the reproducibility of results  
395 across statistical methods, ecological metrics, rarefaction depths, and study populations.  
396 Summarily, this work suggests that abundance variation of specific taxa, rather than whole  
397 communities, may represent the most reliable ethnic signatures in the gut microbiota. A  
398 reproducible co-occurring subset of these taxa link to a variety of overlapping metabolic  
399 processes and health disparities, and contain the most heritable bacterial family,  
400 Christensenellaceae. Moreover, a majority of the microbial taxa associated with ethnicity are  
401 also heritable and genetically-associated lineages, suggesting there is a possible connection  
402 between ethnicity and genetic patterns of biogeographical ancestry that may play a role in  
403 shaping these taxa. Our results emphasize the importance of sampling ethnically diverse  
404 populations of healthy individuals in order to discover and replicate ethnicity signatures in

405 the human gut microbiota, and they highlight a need to account for ethnic variation as a  
406 potential confounding factor in studies linking microbiota variation to disease. Further  
407 reinforcement of these results may lead to generalizations about microbiota assembly and  
408 even consideration of specific taxa as potential mediators or treatments of health disparities.



## 409 **Materials and Methods:**

### 410 *Data Acquisition*

411 AGP data was obtained from the project FTP repository located at  
412 <ftp://ftp.microbio.me/AmericanGut/>. AGP data generation and processing prior to analysis  
413 can be found at: [https://github.com/biocore/American-Gut/tree/master/ipython/primary-](https://github.com/biocore/American-Gut/tree/master/ipython/primary-processing)  
414 [processing](https://github.com/biocore/American-Gut/tree/master/ipython/primary-processing). All analyses utilized the rounds-1-25 dataset which was released on March 4,  
415 2016. Throughout all analyses, QIIME v1.9.0 was used in an Anaconda environment  
416 [<https://continuum.io>] for all script calls, custom scripts and notebooks were run in the  
417 QIIME 2 Anaconda environment with python version 3.5.2, and plots were post-processed  
418 using Inkscape [<https://inkscape.org/en/>] (75). Ethnicity used in this study was self-declared  
419 by AGP study participants as one of four groups: African American, Asian or Pacific Islander  
420 (Asian-Pacific Islander), Caucasian, or Hispanic. Sex was self-declared as either male, female,  
421 or other. Age was self-declared as a continuous integer of years old, and age categories  
422 defined by the AGP by decade (i.e. 20's, 30's...) were used in this study. BMI was self-declared  
423 as an integer, and BMI categories defined by AGP of underweight, healthy, overweight, and  
424 obese were utilized. Microbiota communities were characterized using 16S rDNA  
425 sequencing of variable region four and OTU clustering at 97% similarity, following an  
426 identical processing pipeline for all samples developed and optimized for the Earth  
427 Microbiome Project (76). HMP 16S rDNA data processed using QIIME for variable regions 3-  
428 5 was obtained from <http://hmpdacc.org/HMQCP/>. Demographic info for individual HMP  
429 participants was obtained through dbGaP restricted access to study phs000228.v2.p1, with  
430 dbGaP approval granted to SRB and non-human subjects determination IRB161231 granted  
431 by Vanderbilt University. Ethnicity and sex were assigned to subjects based on self-declared

432 values, with individuals selecting multiple ethnicities being removed unless they primarily  
433 responded as Hispanic, while categorical age and BMI were established from continuous  
434 values using the same criteria for assignment as in AGP. The HMP Amerindian population  
435 was removed due to severe under-representation. This filtered HMP table was used for  
436 community level analyses (ANOSIM, Alpha Diversity, beta intra-inter), however to allow  
437 comparison with the AGP dataset, community subset analyses (co-occurrence, abundance  
438 correlation, etc...) were performed with taxonomic assignments in QIIME using the UCLUST  
439 method with the GreenGenes\_13\_5 reference.

440

#### 441 *Quality Control*

442 AGP quality control was performed in Stata v12 (StataCorp, 2011) using available  
443 metadata to remove samples (Raw N=9,475): with BMI more than 60 (-988 [8,487]) or less  
444 than 10 (-68 [8,419]), missing age (-661 [7,758]), with age greater than 55 years old (-2,777  
445 [4,981]) or less than 18 years old (-582 [4,399]), and blank samples or those not appearing  
446 in the mapping file (-482 [3,917]), with unknown ethnicity or declared as other (-131  
447 [3786]), not declared as a fecal origin (-2,002 [1784]), with unknown sex or declared as other  
448 (-98 [1686]), or located outside of the United States (-209 [1477]). No HMP individuals were  
449 missing key metadata or had other reasons for exclusion (-0[298]). Final community quality  
450 control for both AGP and HMP was performed by filtering OTUs with less than 10 sequences  
451 and removing samples with less than 1,000 sequences (AGP, -102 [1375]; HMP, -0 [298]). All  
452 analyses used 97% OTUs generated by the AGP or HMP, and unless otherwise noted, results  
453 represent Bray-Curtis beta diversity and Shannon alpha diversity at a rarefaction depth of  
454 1,000 counts per sample.

455

456 *ANOSIM, PERMANOVA, and BioEnv Distinguishability*

457         The ANOSIM test was performed with 9,999 repetitions on each rarefied table within  
458 a respective rarefaction depth and beta diversity metric (**Fig 1 & S2A-B Table**), with R-  
459 values and p-values averaged across the rarefactions. Consensus beta diversity matrices  
460 were calculated as the average distances across the 100 rarefied matrices for each beta  
461 diversity metric and depth. Consensus distance matrices were randomly subsampled ten  
462 times for subset number of individuals from each ethnic group with more than that subset  
463 number prior to ANOSIM analysis with 9,999 repetitions, and the results were averaged  
464 evaluating the effects of more even representations for each ethnicity (**S2C Table**).  
465 Consensus distance matrices had each ethnicity and pair of ethnicities removed prior to  
466 ANOSIM analysis with 9,999 repetitions, evaluating the distinguishability conferred by  
467 inclusion of each ethnicity (**Fig 3A, S2F Table**). Significance was not corrected for the  
468 number of tests to allow comparisons between results of different analyses, metrics, and  
469 depths. PERMANOVA analyses were run using the R language implementation in the Vegan  
470 package (77), with data handled in a custom R script using the Phyloseq package (78).  
471 Categorical variables were used to evaluate the PERMANOVA equation (Beta-Diversity  
472 Distance Matrix ~ Ethnicity + Age + Sex + BMI) using 999 permutations to evaluate  
473 significance, and the R and p values were averaged across 10 rarefactions (**S2D Table**). The  
474 BioEnv test, or BEST test, was adapted to allow evaluation of the correlation and significance  
475 between beta diversity distance matrices and age, sex, BMI, and ethnicity simultaneously  
476 (**S2E Table**) (25). At each rarefaction depth and beta diversity metric the consensus distance  
477 matrix was evaluated for its correlation with the centered and scaled Euclidian distance

478 matrix of individuals continuous age and BMI, and categorical ethnicity and sex encoded  
479 using patsy (same methodology as original test)[<https://patsy.readthedocs.io/en/latest/#>].  
480 The test was adapted to calculate significance for a variable of interest by comparing how  
481 often the degree of correlation with all metadata variables (age, sex, BMI, ethnicity) was  
482 higher than the correlation when the variable of interest was randomly shuffled between  
483 samples 1,000 times.

484

#### 485 *Alpha Diversity*

486 Alpha diversity metrics (Shannon, Simpson, Equitability, Chao1, Observed OTUs)  
487 were computed for each rarefied table (QIIME: alpha\_diversity.py), and results were collated  
488 and averaged for each sample across the tables (QIIME: collate\_alpha.py). Pairwise  
489 nonparametric t-tests using Monte Carlo permutations evaluated alpha diversity differences  
490 between the ethnicities with Bonferroni correction for the number of comparisons (**Fig 2A,**  
491 **S3 Table**, QIIME: compare\_alpha\_diversity.py). A Kruskal-Wallis test implemented in python  
492 was used to detect significant differences across all ethnicities.

493

#### 494 *Beta Diversity*

495 Each consensus beta diversity distance matrix had distances organized based on  
496 whether they represented individuals of the same ethnic group, or were between individuals  
497 of different ethnic groups. All values indicate that all pairwise distances between all  
498 individuals were used (**Fig 2B, S4A-B Table**), mean values indicate that for each individual  
499 their average distance to all individuals in the comparison group was used as a single point  
500 to assess pseudo-inflation (**S4C-D Table**). A Kruskal-Wallis test was used to calculate

501 significant differences in intra-ethnic distances across all ethnicities. Pairwise Mann-  
502 Whitney-U tests were calculated between each pair of intra-ethnic distance comparisons,  
503 along with intra-versus-inter ethnic distance comparisons. Significance was Bonferroni  
504 corrected within the number of intra-intra-ethnic and intra-inter-ethnic distance groups  
505 compared, with violin plots of intra- and inter-ethnic beta diversity distances generated for  
506 each comparison.

507

### 508 *Random Forest*

509 RF models were implemented using taxa summarized at genus level, which  
510 performed better compared to RF models using OTUs as features, both in terms of  
511 classification accuracy and computational time. We first rarefied OTU tables at sequence  
512 depth of 10,000 (using R v3.3.3 package *vegan's* `rrarefy()` function) and then summarized  
513 rarefied OTUs at genus-level (or lower characterized level if genus was uncharacterized for  
514 an OTU). We filtered for rare taxa by removing taxa present in fewer than half of the number  
515 of samples in rarest ethnicity (i.e. fewer than  $10/2 = 5$  samples in HMP and  $13/2 = 6$  (rounded  
516 down) in AGP), retaining 85 distinct taxa in HMP dataset and 322 distinct taxa in AGP dataset  
517 at genus level. The resulting taxa were normalized to relative abundance and arcsin-sqrt  
518 transformed before being used as features for the RF models. We initially built multi-class  
519 RF model, but since the RF model is highly sensitive to the uneven representation of classes,  
520 all samples were identified as the majority class, i.e. Caucasian. In order to even out the class  
521 imbalance, we considered some sampling approaches, but most existing techniques for  
522 improving classification performance on imbalanced datasets are designed for binary class  
523 imbalanced datasets, and are not effective on datasets with multiple underrepresented

524 classes. Hence, we adopted the binary classification approach and built four one-versus-all  
525 (OVA) binary RF classifiers to classify samples from each ethnicity compared to the rest. 10-  
526 fold cross-validation (using R package *caret* (79)) was performed using ROC as the metric  
527 for selecting optimal model. The performance metrics and ROC curves were averaged across  
528 the 10 folds (**Fig 3B**). Without any sampling during training the classifiers, most samples  
529 were identified as the majority class, i.e. the Caucasian, by all four OVA RF classifiers. In order  
530 to overcome this imbalance in class representation, we applied two sampling techniques  
531 inside cross-validation: i) down-sampling, and ii) Synthetic Minority Over-sampling  
532 Technique (or SMOTE) (29). In the down-sampling approach, the majority class is down-  
533 sampled by random removal of instances from the majority class. In the SMOTE approach,  
534 the majority class is down-sampled and synthetic samples from the minority class are  
535 generated based on k-nearest neighbors technique (29). Note, the sampling was performed  
536 inside cross-validation on training set, while the test was performed on unbalanced held-out  
537 test set in each fold. The ROC curves and performance metrics table in **Fig 3B** show the  
538 sensitivity-specificity tradeoff and classification performance for OVA classifier for each  
539 ethnicity for both the sampling techniques applied on both the datasets. For both the  
540 datasets, down-sampling shows higher sensitivity and lower specificity and precision for  
541 minority classes (i.e. African Americans, Asian-Pacific Islanders and Hispanics) compared to  
542 SMOTE. However, for the majority class (i.e. Caucasian), down-sampling lowers the  
543 sensitivity and increases the specificity and precision compared to SMOTE. The sensitivity-  
544 specificity tradeoff, denoted by the area under the ROC curve (or AUC) is reduced for  
545 Hispanics in both the datasets.

546

547 *Taxon Associations*

548 Taxon differential abundance across categorical metadata groups was performed in  
549 QIIME (QIIME: group\_significance.py, **S5 Table**) to examine whether observation counts (i.e.  
550 OTUs and microbial taxon) are significantly different between groups within a metadata  
551 category (i.e. ethnicity, sex, BMI, age). The OTU table prior to final community quality control  
552 was collapsed at each taxonomic level (i.e. Phylum – Genus; QIIME: collapse\_taxonomy.py),  
553 with counts representing the relative abundance of each microbial taxon. Differences in the  
554 mean abundance of taxa between ethnicities were calculated using Kruskal-Wallis  
555 nonparametric statistical tests. P-values are provided alongside false discovery rate and  
556 Bonferroni corrected P-values, and taxa were ranked from most to least significant. Results  
557 were collated into excel tables by taxonomic level and metadata category being examined,  
558 with significant (false discovery rate and Bonferroni P-value < 0.05) highlighted in orange,  
559 and taxa that were false discovery rate significant in both datasets were colored red. The  
560 Fisher's exact test for the overlap of number of significant taxa between datasets was run at  
561 the online portal (<http://vassarstats.net/tab2x2.html>), with the expected overlap calculated  
562 as 5% of the number of significant lineages at all taxonomic level within the respective  
563 dataset, and the observed 25 taxa that overlapped in our analysis. The permutation analysis  
564 was performed by comparing the number of significant taxa (**S5 Table**,  $p_{FDR} < 0.05$ )  
565 overlapping between the AGP and HMP to the number overlapping when the Kruskal-Wallis  
566 test was performed 1,000 times with ethnicity randomly permuted. In 1/1000 runs there  
567 was one significant taxon overlapping at the family level, and one in 3/1000 permutations at  
568 the genus level, with no significant taxa overlapping in any repetitions at higher taxonomic  
569 levels. The 12 families and genera that were significantly different were evaluated to not be

570 'unique' if their abundances across ethnicities at each level represented at least 82-100%  
571 (nearly all >95%) of the overlapping taxonomic level, and the genera was used if classified,  
572 and family level used if genera was unclassified (g\_\_). Average relative abundances on a log<sub>10</sub>  
573 scale among individuals possessing the taxon were extracted for each taxon within each  
574 ethnicity, and the abundance for 12 families and genera were made into barchart figures (**Fig**  
575 **4**). The external whisker (AGP above, HMP below) depict the 75<sup>th</sup> quartile of abundance, and  
576 the internal whisker depicts the 25<sup>th</sup> quartile. Pairwise Mann-Whitney-U tests were  
577 performed between each pair of ethnicities using microbial abundances among all  
578 individuals, and were Bonferroni corrected for the six comparisons within each taxon and  
579 dataset. Bonferroni significant P-values are shown in the figure, and shown in bold if  
580 significance and direction of change replicate in both datasets. Ubiquity shown above or  
581 below each bar was calculated as the number of individuals in which that taxon was detected  
582 within the respective ethnicity. Additional confirmation of ethnically varying abundance was  
583 also performed at each taxonomic level (**S6 Table**), where the correlation of continuous age  
584 and BMI along with categorically coded sex and ethnicity were simultaneously measured  
585 against the log<sub>10</sub> transformed relative abundance of each taxon among individuals  
586 possessing it using linear regression (**S6 Table - Abundance**), and against the presence or  
587 absence of the taxon in all individuals with logistic regression (**S6 Table - Presence Absence**).  
588 Significance is presented for the models each with ethnicity alone, and with all metadata  
589 factors included (age, sex, BMI), alongside Bonferroni corrected p-values, and individual  
590 effects of each metadata factor.

591

592 Co-Occurrence Analysis



593 Bacterial taxonomy was collapsed at the family level, Spearman correlation was  
594 calculated between each pair of families using SciPy (80), and clustermaps were generated  
595 using seaborn (**S2 Fig**), and ethnic associations were drawn from **S5 Table**. Correlations  
596 were masked where Bonferroni corrected Spearman p-values were  $>0.05$ , and clusters were  
597 identified as the most prominent (strongest correlations) and abundance enriched.  
598 Enrichment of ethnic association was evaluated by measuring the Mann-Whitney-U of  
599 cluster families ethnic associations (p-values, **S5 Table**) compared to the ethnic associations  
600 of non-cluster taxa. Cluster associated families were identified as having at least three  
601 significant correlations with families within the cluster.

602

#### 603 Christensenellaceae Analysis

604 The abundance of the family Christensenellaceae was input as relative abundance  
605 across all individuals from the family level taxonomic table. Individuals were subset based  
606 on the presence/absence of Christensenellaceae and BMIs were compared using a one tailed  
607 Mann-Whitney-U test, then each was further subset by ethnicity and BMI compared using  
608 one tailed Mann-Whitney-U tests and boxplots within each ethnicity (**Fig 5**).

609

#### 610 Genetically Associated, Heritable, and Correlated Taxa Analysis

611 Genetically associated taxa from population heritability studies (30, 31, 35, 36) with  
612 a minimum heritability ( $A$  in ACE models or  $H^2_r$ )  $>0.1$ , and from GWAS studies (31, 36) were  
613 examined for exact taxonomic overlap with our 12 ethnically-associated taxa. The 42 genetic  
614 variants associated with Unclassified Clostridiales are: rs16845116, rs586749, rs7527642,  
615 rs10221827, rs5754822, rs4968435, rs17170765, rs1760889, rs6933411, rs2830259,

616 rs7318523, rs17763551, rs2248020, rs1278911, rs185902, rs2505338, rs6999713,  
617 rs5997791, rs7236263, rs10484857, rs9938742, rs1125819, rs4699323, rs641527,  
618 rs7302174, rs2007084, rs2293702, rs9350764, rs2170226, rs2273623, rs9321334,  
619 rs6542797, rs9397927, rs2269706, rs4717021, rs7499858, rs10148020, rs7524581,  
620 rs11733214, rs7587067 from (31). These 40 variants along with variants in **Table 1** except  
621 for chr7:96414393 (total=49) were then assessed in 1,000 Genomes individuals for  
622 significant differentiation across superpopulations (34). The 1,000 Genomes VCF files were  
623 downloaded (<ftp://ftp.1000genomes.ebi.ac.uk/vol1/ftp/release/20130502/>), and variants  
624 with a minor allele frequency less than 0.01 were removed with  $F_{ST}$  calculated between each  
625 pair of superpopulations using vcfTools (81). The East Asian versus South Asian  $F_{ST}$  rates  
626 were not used in the analysis. A custom script was used to examine the  $F_{ST}$  for each of the 49  
627 variants and compare to the  $F_{ST}$  of all variants on the same chromosome and all variants  
628 genome-wide for that pair of populations, with percentile calculated and the number of  
629 variants with a higher  $F_{ST}$  divided by the total number of variants. The eQTL value and  
630 significance for rs7587067 were drawn from the GTEx database (67).

631

## 632 Data and Code Availability

633 Code, scripts, and data underlying figures are publicly available from the GitHub  
634 repository [[https://github.com/awbrooks19/microbiota\\_and\\_ethnicity](https://github.com/awbrooks19/microbiota_and_ethnicity)]. Individual  
635 metadata (age, sex, ethnicity...) for the Human Microbiome Project are held under restricted  
636 access available through dbGaP application [NCBI - dbGaP, Human Microbiome Project,  
637 [https://www.ncbi.nlm.nih.gov/projects/gap/cgi-](https://www.ncbi.nlm.nih.gov/projects/gap/cgi-bin/study.cgi?study_id=phs000228.v3.p1)  
638 [bin/study.cgi?study\\_id=phs000228.v3.p1](https://www.ncbi.nlm.nih.gov/projects/gap/cgi-bin/study.cgi?study_id=phs000228.v3.p1)].

639

## 640 Acknowledgements

641 This work was supported by National Institutes of Health training grants  
642 4T32GM08017810, 5T32GM08017809, and 5T32GM0817808 to AWB, the Vanderbilt Office  
643 of Equity, Diversity and Inclusion to A.W.B. and S.R.B., the Vanderbilt Microbiome Initiative  
644 to S.R.B., and the Alfred P. Sloan Foundation Fellowship to R.B.. The content is solely the  
645 responsibility of the authors and does not necessarily represent the official views of the  
646 National Institutes of Health. We thank the American Society of Microbiology for supporting  
647 travel to present this work. We would also like to thank Tony Capra, David Samuels, Patrick  
648 Abbot, Antonis Rokas, and other members of the Vanderbilt Genetics Institute and  
649 Bordenstein Lab for input. The authors acknowledge the Minnesota Supercomputing  
650 Institute (MSI) at the University of Minnesota and the Advanced Computing Center for  
651 Research and Education (ACCRE) at Vanderbilt University for providing resources that  
652 contributed to the research results reported within this paper.

653

## 654 Contributions

655 A.W.B., S.P., R.B., and S.R.B. conceived and designed the research. A.W.B. performed,  
656 analyzed, and interpreted all experiments with the exception of the Random Forest analysis  
657 planned and performed by S.P. and R.B. S.R.B. supervised all experimental designs, data  
658 analysis, and data interpretation. All authors participated in manuscript preparation, editing,  
659 and final approval.

660

## 661 Competing Financial Interests

662           The authors declare no competing financial interests.

663

664

665 **Supplementary Table/Figure Legends:**

666 **S1 Fig.** The average relative abundance of dominant microbial phyla for each ethnicity.

667

668 **S2 Fig. Abundance correlation of microbial families.** Spearman correlation clustermaps  
669 of bacterial abundance for families in the AGP and HMP. Numbers within boxes depict the  
670 spearman correlation value with heatmap coloration from blue negative correlation (-1),  
671 white no correlation (0), to red positive correlation (1). Positions have been masked based  
672 on Bonferroni significance  $<0.05$  for the total clustermap of all microbial families. Lineages  
673 within boxes were identified as a highly correlated cluster, and lineages outside the boxes  
674 share multiple correlations with those within the cluster. Blue taxonomic names indicate  
675 overlap of taxa within boxes of both the AGP and HMP, while black indicate multiple  
676 correlations with the clusters in both datasets. The ethnic association column depicts FDR  
677 corrected p-values from Kruskal-Wallis tests in **S5 Table**, which are bolded if  $<0.05$ .

678

679 **S3 Fig. Correlation of BMI with Christensenellaceae abundance.** The relationship for  
680 each individual between log<sub>10</sub> transformed Christensenellaceae abundance on the y axis and  
681 BMI on the x axis, with statistics slope,  $R^2$ , and p fit with a linear regression. Coloration of  
682 each point indicates ethnicity: Yellow – African American; Blue – Asian-Pacific Islander;  
683 Green – Hispanic; Red – Caucasian.

684

685 **S1 Table. Demographic information for the AGP.** Breakdown of age and BMI by sex and  
686 ethnicity. Heatmaps were constructed within each statistic and category (bounded by black  
687 box). The means for all sex and ethnic groups were used as the center (white), with higher

688 values indicated in red and lower in blue. HMP data is not shown because of data access  
689 restrictions on participant metadata, available through dbGaP application.

690

691 **S2 Table. Microbiota distinguishability by ethnicity, age, sex and BMI.** (A) AGP and HMP  
692 ANOSIM distinguishability by ethnicity, age, sex, and BMI at a rarefaction depth of 1,000 and  
693 across four ecological metrics (more details in table). (B) AGP ANOSIM distinguishability by  
694 ethnicity, age, sex, and BMI at rarefaction depths of 1,000 and 10,000. (C) ANOSIM results  
695 for consensus distance matrix while subsampling the maximum number of individuals from  
696 each ethnic group. (D) BioEnv results of correlation between ethnicity, age, sex, and BMI  
697 together with outcome as multivariate beta diversity distance matrices [Distance Matrix =  
698 Ethnicity\*x1 + Categorical Age\*x2 + Categorical BMI\*x3 + Sex\*x4 + B]. (E) ANOSIM results  
699 for consensus distance matrix when each ethnicity and group of ethnicities are sequentially  
700 removed from the analysis.

701

702 **S3 Table. Alpha diversity by ethnicity, age, sex and BMI.** Alpha Diversity for Ethnicity,  
703 Age, Sex, and BMI across varying rarefaction depths and beta diversity metrics in AG (4A, 4C-  
704 E), and for ethnicity in the HMP (4B). Results are based on non-parametric permutation  
705 based t-tests, and p-values are Bonferroni corrected within each factor of interest, depth, and  
706 metric.

707

708 **S4 Table. Comparison of beta diversity distances for within and between ethnicities.**  
709 All values depicted are Mann-Whitney-U p-values. (A) All distances between pairs of  
710 individuals within each ethnicity were compared between ethnicities across rarefaction

711 depths 1,000 and 10,000, four beta diversity metrics, and with while subsampling over-  
712 represented ethnicities. (B) All distances between pairs of individuals within and between  
713 each ethnicity were compared between ethnicities. (C) Mean distances between pairs of  
714 individuals within each ethnicity were compared between ethnicities. (D) Mean distances  
715 between pairs of individuals within and between each ethnicity were compared between  
716 ethnicities.

717

718 **S5 Table. Taxa which are differentially abundant by ethnicity, sex, BMI, and age in the**  
719 **AGP and HMP.** Kruskal-Wallis results for differential taxa abundance across metadata  
720 groupings, including FDR and Bonferroni corrected p-values, and taxa abundance averages  
721 within each group. Metadata factors and taxonomic levels are separated by excel tabs.

722

723 **S6 Table. Taxa which are correlated with ethnicity, sex, BMI, and age in the AGP.**  
724 Results of linear (Abundance) and logistic (Presence Absence) regression results for  
725 differential taxa abundance across metadata factors separated by taxonomic level. Columns  
726 in order indicate the taxon name, the number of individuals with non-zero abundance; then  
727 the p-value for ethnicity alone, the p-value Bonferroni corrected, the f-test statistic, and  $R^2$ ;  
728 then the same values for the regression with ethnicity, age, sex, and BMI together; then the  
729 abundances in each ethnic group, and finally the p-values for each factor broken down.

730

731 **S7 Table. Genetic variants with taxa associations and detailed 1,000 Genomes**  
732 **population differentiation rates ( $F_{ST}$ ).** Variants in red indicate the variant has at least one  
733  $F_{ST}$  above the 95<sup>th</sup> percentile for high differentiation between at least one pair of populations.

734 Columns I-BU represent the values for calculating variant  $F_{ST}$  and percentiles. The first two  
735 spaces indicate the two superpopulations being compared.  $F_{ST}$  indicates the rate of  
736 differentiation for that variant between that pair of populations. Higher indicates the  
737 number of variants genome-wide with a higher  $F_{ST}$ , and total indicates the total genome-wide  
738 variants examined. The columns with chromosome indicate the number of variants with  
739 higher  $F_{ST}$  and total variants on the same chromosome as the variant of interest. Percent  
740 indicates the number of variants with a higher  $F_{ST}$  divided by the total number of variants.

741

742 **References:**

- 743 1. Turnbaugh PJ, Hamady M, Yatsunencko T, Cantarel BL, Duncan A, Ley RE, et al. A core  
744 gut microbiome in obese and lean twins. *Nature*. 2009;457(7228):480-4.
- 745 2. Qin J, Li R, Raes J, Arumugam M, Burgdorf KS, Manichanh C, et al. A human gut  
746 microbial gene catalogue established by metagenomic sequencing. *Nature*.  
747 2010;464(7285):59-65.
- 748 3. Huse SM, Ye Y, Zhou Y, Fodor AA. A core human microbiome as viewed through 16S  
749 rRNA sequence clusters. *PLoS One*. 2012;7(6):e34242.
- 750 4. Wu GD, Chen J, Hoffmann C, Bittinger K, Chen YY, Keilbaugh SA, et al. Linking long-  
751 term dietary patterns with gut microbial enterotypes. *Science*. 2011;334(6052):105-8.
- 752 5. Muegge BD, Kuczynski J, Knights D, Clemente JC, González A, Fontana L, et al. Diet  
753 drives convergence in gut microbiome functions across mammalian phylogeny and within  
754 humans. *Science*. 2011;332:970-4.
- 755 6. Human Microbiome Project C. Structure, function and diversity of the healthy  
756 human microbiome. *Nature*. 2012;486(7402):207-14.
- 757 7. David LA, Maurice CF, Carmody RN, Gootenberg DB, Button JE, Wolfe BE, et al. Diet  
758 rapidly and reproducibly alters the human gut microbiome. *Nature*. 2013;505(7484):559-  
759 63.
- 760 8. Yatsunencko T, Rey FE, Manary MJ, Trehan I, Dominguez-Bello MG, Contreras M, et al.  
761 Human gut microbiome viewed across age and geography. *Nature*. 2012;486(7402):222-7.
- 762 9. Davenport ER, Cusanovich DA, Michelini K, Barreiro LB, Ober C, Gilad Y. Genome-  
763 Wide Association Studies of the Human Gut Microbiota. *PLoS One*. 2015;10(11):e0140301.
- 764 10. Fierera N, Hamadyc M, Lauberb CL, Knight R. The influence of sex, handedness, and  
765 washing on the diversity of hand surface bacteria. *Proceedings of the National Academy of*  
766 *Sciences*.105(46).
- 767 11. Qin J, Li Y, Cai Z, Li S, Zhu J, Zhang F, et al. A metagenome-wide association study of  
768 gut microbiota in type 2 diabetes. *Nature*. 2012;490(7418):55-60.



- 769 12. Frank DN, Allison AL, Feldman RA, Boedeker EC, Harpaz N, Pace NR. Molecular-  
770 phylogenetic characterization of microbial community imbalances in human inflammatory  
771 bowel diseases. *Proceedings of the National Academy of Sciences*. 2007(104):13780–5.
- 772 13. Walters WA, Xu Z, Knight R. Meta-analyses of human gut microbes associated with  
773 obesity and IBD. *FEBS Lett*. 2014;588(22):4223-33.
- 774 14. Zackular JP, Baxter NT, Iverson KD, Sadler WD, Petrosino JF, Chen GY, et al. The gut  
775 microbiome modulates colon tumorigenesis. *MBio*. 2013;4(6):e00692-13.
- 776 15. Mason MR, Nagaraja HN, Camerlengo T, Joshi V, Kumar PS. Deep sequencing  
777 identifies ethnicity-specific bacterial signatures in the oral microbiome. *PLoS One*.  
778 2013;8(10):e77287.
- 779 16. Ravela J, Gajera P, Abdob ZG, Schneiderc M, Koeniga SSK, McCullea SL, et al. Vaginal  
780 microbiome of reproductive-age women. *Proceedings of the National Academy of Sciences*.  
781 2011;108:4680-7.
- 782 17. Fettweis JM, Brooks JP, Serrano MG, Sheth NU, Girerd PH, Edwards DJ, et al.  
783 Differences in vaginal microbiome in African American women versus women of European  
784 ancestry. *Microbiology*. 2014;160(Pt 10):2272-82.
- 785 18. Williams DR, Priest N, Anderson NB. Understanding associations among race,  
786 socioeconomic status, and health: Patterns and prospects. *Health Psychol*. 2016;35(4):407-  
787 11.
- 788 19. Mersha TB, Abebe T. Self-reported race/ethnicity in the age of genomic research: its  
789 potential impact on understanding health disparities. *Human Genomics*. 2015;9(1):1.
- 790 20. McDonald D, Birmingham A, Knight R. Context and the human microbiome.  
791 *Microbiome*. 2015;3:52.
- 792 21. Kolde R, Franzosa EA, Rahnavard G, Hall AB, Vlamakis H, Stevens C, et al. Host  
793 genetic variation and its microbiome interactions within the Human Microbiome Project.  
794 *Genome Med*. 2018;10(1):6.
- 795 22. Rothschild D, Weissbrod O, Barkan E, Korem T, Zeevi D, Costea PI, et al.  
796 Environmental factors dominate over host genetics in shaping human gut microbiota  
797 composition. *BioRxiv*. 2017.
- 798 23. DeSantis TZ, Hugenholtz P, Larsen N, Rojas M, Brodie EL, Keller K, et al. Greengenes,  
799 a chimera-checked 16S rRNA gene database and workbench compatible with ARB. *Appl*  
800 *Environ Microbiol*. 2006;72(7):5069-72.
- 801 24. Clarke KR. Non-parametric multivariate analyses of changes in community  
802 structure. *Australian Journal of Ecology*. 1993;18:117-43.
- 803 25. Clarke KR, Ainsworth M. A method of linking multivariate community structure to  
804 environmental variables. *Marine Ecology*. 1993;92:205-19
- 805 .
- 806 26. Knights D, Costello EK, Knight R. Supervised classification of human microbiota.  
807 *FEMS Microbiol Rev*. 2011;35(2):343-59.
- 808 27. Shannon CE. A mathematical theory of communication. *Bell Syst Tech J*.  
809 1948;27:379-423.
- 810 28. Hester ER, Barott KL, Nulton J, Vermeij MJ, Rohwer FL. Stable and sporadic  
811 symbiotic communities of coral and algal holobionts. *ISME J*. 2016;10(5):1157-69.
- 812 29. N.V. C, K.W. B, L.O. H, W.P. K. SMOTE: Synthetic Minority Over-sampling Technique.  
813 *Journal of Artificial Intelligence Research*. 2002;16:321-57.

- 814 30. Goodrich JK, Waters JL, Poole AC, Sutter JL, Koren O, Blekhman R, et al. Human  
815 genetics shape the gut microbiome. *Cell*. 2014;159(4):789-99.
- 816 31. Goodrich JK, Davenport ER, Beaumont M, Jackson MA, Knight R, Ober C, et al. Genetic  
817 Determinants of the Gut Microbiome in UK Twins. *Cell Host Microbe*. 2016;19(5):731-43.
- 818 32. Fu J, Bonder MJ, Cenit MC, Tigchelaar EF, Maatman A, Dekens JA, et al. The Gut  
819 Microbiome Contributes to a Substantial Proportion of the Variation in Blood Lipids. *Circ*  
820 *Res*. 2015;117(9):817-24.
- 821 33. Pennisi E. Human Genetic Variation. *Science*. 2007;318(5858):1842-3.
- 822 34. Genomes Project C, Auton A, Brooks LD, Durbin RM, Garrison EP, Kang HM, et al. A  
823 global reference for human genetic variation. *Nature*. 2015;526(7571):68-74.
- 824 35. Lim MY, You HJ, Yoon HS, Kwon B, Lee JY, Lee S, et al. The effect of heritability and  
825 host genetics on the gut microbiota and metabolic syndrome. *Gut*. 2016.
- 826 36. Turpin W, Espin-Garcia O, Xu W, Silverberg MS, Kevans D, Smith MI, et al.  
827 Association of host genome with intestinal microbial composition in a large healthy cohort.  
828 *Nature Genetics*. 2016;48(11):1413-7.
- 829 37. Almasy L, Blangero J. Multipoint quantitative-trait linkage analysis in general  
830 pedigrees. *Am J Hum Genet*. 1998;62(5):1198-211.
- 831 38. Morgan XC, Tickle TL, Sokol H, Gevers D, Huttenhower C. Dysfunction of the  
832 intestinal microbiome in inflammatory bowel disease and treatment. *Genome Biology*.  
833 2012;7(979).
- 834 39. Lewis JD, Chen EZ, Baldassano RN, Otleay AR, Griffiths AM, Lee D, et al. Inflammation,  
835 Antibiotics, and Diet as Environmental Stressors of the Gut Microbiome in Pediatric Crohn's  
836 Disease. *Cell Host Microbe*. 2015;18(4):489-500.
- 837 40. Goker M, Gronow S, Zeytun A, Nolan M, Lucas S, Lapidus A, et al. Complete genome  
838 sequence of *Odoribacter splanchnicus* type strain (1651/6). *Stand Genomic Sci*.  
839 2011;4(2):200-9.
- 840 41. Castaneda G, Liu B, Torres S, Bhuket T, Wong RJ. Race/Ethnicity-Specific Disparities  
841 in the Severity of Disease at Presentation in Adults with Ulcerative Colitis: A Cross-  
842 Sectional Study. *Dig Dis Sci*. 2017.
- 843 42. Boucias DG, Cai Y, Sun Y, Lietze VU, Sen R, Raychoudhury R, et al. The hindgut lumen  
844 prokaryotic microbiota of the termite *Reticulitermes flavipes* and its responses to dietary  
845 lignocellulose composition. *Mol Ecol*. 2013;22(7):1836-53.
- 846 43. LATHAM MJ, WOLIN MJ. Fermentation of Cellulose by *Ruminococcus flavefaciens* in  
847 the Presence and Absence of *Methanobacterium ruminantium*. *Appl Environ Microbiol*.  
848 1977;34(3):297-301.
- 849 44. Falony G, Raes J. Population-level analysis of gut microbiome variation. *Science*.  
850 2016;352(6285):560-4.
- 851 45. Biagi E, Franceschi C, Rampelli S, Severgnini M, Ostan R, Turrone S, et al. Gut  
852 Microbiota and Extreme Longevity. *Curr Biol*. 2016;26(11):1480-5.
- 853 46. Thevaranjan N, Puchta A, Schulz C, Naidoo A, Szamosi JC, Verschoor CP, et al. Age-  
854 Associated Microbial Dysbiosis Promotes Intestinal Permeability, Systemic Inflammation,  
855 and Macrophage Dysfunction. *Cell Host Microbe*. 2017;21(4):455-66 e4.
- 856 47. Xie W, Wood AR, Lyssenko V, et al. Genetic Variants Associated With Glycine  
857 Metabolism and Their Role in Insulin Sensitivity and Type 2 Diabetes. *Diabetes*. 2013;62.
- 858 48. Williams SR, Yang Q, Chen F, Liu X, Keene KL, Jacques P, et al. Genome-wide meta-  
859 analysis of homocysteine and methionine metabolism identifies five one carbon

- 860 metabolism loci and a novel association of ALDH1L1 with ischemic stroke. *PLoS Genet.*  
861 2014;10(3):e1004214.
- 862 49. Petersen LM, Bautista EJ, Nguyen H, Hanson BM, Chen L, Lek SH, et al. Community  
863 characteristics of the gut microbiomes of competitive cyclists. *Microbiome.* 2017;5(1):98.
- 864 50. Nakamura N, Lin HC, McSweeney CS, Mackie RI, Gaskins HR. Mechanisms of  
865 microbial hydrogen disposal in the human colon and implications for health and disease.  
866 *Annu Rev Food Sci Technol.* 2010;1:363-95.
- 867 51. Parthasarathy G, Chen J, Chen X, Chia N, O'Connor HM, Wolf PG, et al. Relationship  
868 Between Microbiota of the Colonic Mucosa vs Feces and Symptoms, Colonic Transit, and  
869 Methane Production in Female Patients With Chronic Constipation. *Gastroenterology.*  
870 2016;150(2):367-79 e1.
- 871 52. Jackson CS, Oman M, Patel AM, Vega KJ. Health disparities in colorectal cancer  
872 among racial and ethnic minorities in the United States. *J Gastrointest Oncol.* 2016;7:S32-  
873 43.
- 874 53. Lopetuso LR, Scaldaferrri F, Petito V, Gasbarrini A. Commensal Clostridia: leading  
875 players in the maintenance of gut homeostasis. *Gut Pathogens.* 2013.
- 876 54. Sy DF. The Center for Asian Health Engages Communities in Research to Reduce  
877 Asian American Health Disparities. US Department of Health & Human Services, National  
878 Institute on Minority Health and Health Disparities.
- 879 55. Hwang H. Colorectal Cancer Screening among Asian Americans. *Asian Pacific Journal*  
880 *of Cancer Prevention.* 2013;14(7):4025-32.
- 881 56. Oh KM, Kreps GL, Jun J. Colorectal Cancer Screening Knowledge, Beliefs, and  
882 Practices of Korean Americans. *American Journal of Health Behavior.* 2013;37(3):381-94.
- 883 57. Sankaranarayanan R, Ramadas K, Qiao Y-l. Managing the changing burden of cancer  
884 in Asia. *BMC Medicine.* 2014;12(3).
- 885 58. Pourhoseingholi MA. Increased burden of colorectal cancer in Asia. *World J*  
886 *Gastrointest Oncol.* 2012;4(4):68-70.
- 887 59. Pourhoseingholi MA, Vahedi M, Baghestani AR. Burden of gastrointestinal cancer in  
888 Asia; an overview. *Gastroenterology and Hepatology.* 2015.
- 889 60. Pourhoseingholi MA. Epidemiology and burden of colorectal cancer in Asia-Pacific  
890 region: what shall we do now? *Translational Gastrointestinal Cancer.* 2014;3(4):169-73.
- 891 61. Report CHDaI. 2013.
- 892 62. Cao H, Liu X, An Y, Zhou G, Liu Y, Xu M, et al. Dysbiosis contributes to chronic  
893 constipation development via regulation of serotonin transporter in the intestine. *Sci Rep.*  
894 2017;7(1):10322.
- 895 63. Mosca A, Leclerc M, Hugot JP. Gut Microbiota Diversity and Human Diseases: Should  
896 We Reintroduce Key Predators in Our Ecosystem? *Front Microbiol.* 2016;7:455.
- 897 64. Zhang X, Zhang D, Jia H, Feng Q, Wang D, Liang D, et al. The oral and gut  
898 microbiomes are perturbed in rheumatoid arthritis and partly normalized after treatment.  
899 *Nat Med.* 2015;21(8):895-905.
- 900 65. Singh VP, Proctor SD, Willing BP. Koch's postulates, microbial dysbiosis and  
901 inflammatory bowel disease. *Clin Microbiol Infect.* 2016;22(7):594-9.
- 902 66. Sherry ST WM, Kholodov M, Baker J, Phan L, Smigielski EM, Sirotkin K. dbSNP: the  
903 NCBI database of genetic variation. *Nucleic Acids Research.* 2001;29(308).
- 904 67. Consortium GT. The Genotype-Tissue Expression (GTEx) project. *Nat Genet.*  
905 2013;45(6):580-5.

- 906 68. Qiu X, Wei R, Li Y, Zhu Q, Xiong C, Chen Y, et al. NEDL2 regulates enteric nervous  
907 system and kidney development in its Neddl8 ligase activity-dependent manner.  
908 *Oncotarget*. 2016;7(21).
- 909 69. Wei R, Qiu X, Wang S, Li Y, Wang Y, Lu K, et al. NEDL2 is an essential regulator of  
910 enteric neural development and GDNF/Ret signaling. *Cell Signal*. 2015;27(3):578-86.
- 911 70. O'Donnell AM, Coyle D, Puri P. Decreased expression of NEDL2 in Hirschsprung's  
912 disease. *J Pediatr Surg*. 2016;51(11):1839-42.
- 913 71. Roberts SJ, Stewart AJ, Schmid R, Blindauer CA, Bond SR, Sadler PJ, et al. Probing the  
914 substrate specificities of human PHOSPHO1 and PHOSPHO2. *Biochim Biophys Acta*.  
915 2005;1752(1):73-82.
- 916 72. Ikeda M, Hosotani T, Kurimoto K, Mori T, Ueda T, Kotake Y, et al. The differences of  
917 the metabolism related to vitamin B6-dependent enzymes among vitamin B6-deficient  
918 germ-free and conventional rats. *Nutritional Science Vitaminology*. 1979;131(9).
- 919 73. Nagy-Szakal D, Williams BL, Mishra N, Che X, Lee B, Bateman L, et al. Fecal  
920 metagenomic profiles in subgroups of patients with myalgic encephalomyelitis/chronic  
921 fatigue syndrome. *Microbiome*. 2017;5(1):44.
- 922 74. Bhui KS, Dinos S, Ashby D, Nazroo J, Wessely S, White PD. Chronic fatigue syndrome  
923 in an ethnically diverse population: the influence of psychosocial adversity and physical  
924 inactivity. *BMC Medicine*. 2011;9(26).
- 925 75. Caporaso JG, Kuczynski J, Stombaugh J, Bittinger K, Bushman FD, Costello EK, et al.  
926 QIIME allows analysis of high-throughput community sequencing data. *Nat Method*.  
927 2010;7:335-6.
- 928 76. Caporaso JG, Lauber CL, Walters WA, Berg-Lyons D, Huntley J, Fierer N, et al. Ultra-  
929 high-throughput microbial community analysis on the Illumina HiSeq and MiSeq platforms.  
930 *ISME J*. 2012;6(8):1621-4.
- 931 77. Anderson MJ. A new method for non-parametric multivariate analysis of variance.  
932 *Australian Journal of Ecology*. 2001;26:32-46.
- 933 78. McMurdie PJ, Holmes S. phyloseq: an R package for reproducible interactive analysis  
934 and graphics of microbiome census data. *PLoS One*. 2013;8:e61217.
- 935 79. Kuhn M. A short introduction to the caret package. 2017.
- 936 80. Jones E, Oliphant T, Peterson P. Open Source Scientific Tools for Python. 2001.
- 937 81. Danecek P, Auton A, Abecasis G, Albers CA, Banks E, DePristo MA, et al. The variant  
938 call format and VCFtools. *Bioinformatics*. 2011;27(15):2156-8.

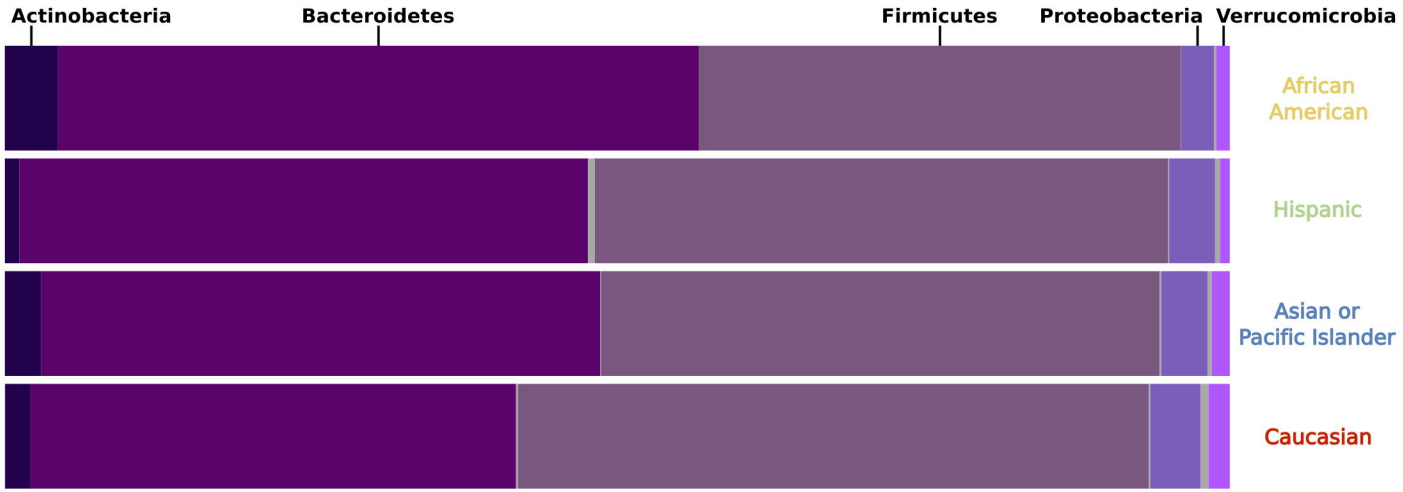

American Gut Project

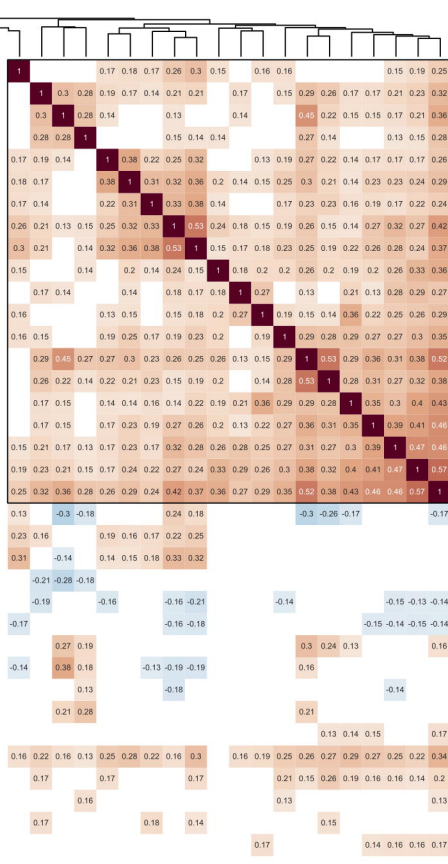

(Blue: Overlap Within Cluster | Bold: Overlap Correlated with Cluster)

| Taxonomic Lineage                                                                                       | Ethnic Association (FDR Significant p-value) |
|---------------------------------------------------------------------------------------------------------|----------------------------------------------|
| k__Bacteria; p__Proteobacteria; c__Deltaproteobacteria; o__Desulfuovibrionales; f__Desulfuovibrionaceae | 0.00067                                      |
| k__Bacteria; p__Firmicutes; c__Clostridia; o__Clostridiales; f__Peptococcaceae                          | 0.00138                                      |
| k__Bacteria; p__Firmicutes; c__Clostridia; o__Clostridiales; f__Ruminococcaceae                         | 0.00085                                      |
| k__Bacteria; p__Firmicutes; c__Clostridia; o__Clostridiales; f__[Mogibacteriaceae]                      | 0.00171                                      |
| k__Bacteria; p__Cyanobacteria; c__4C0d-2; o__YS2; f__                                                   | 3.38e-6                                      |
| k__Bacteria; p__Proteobacteria; c__Alphaproteobacteria; o__RF32; f__                                    | 4.10e-6                                      |
| k__Bacteria; p__Bacteroidetes; c__Bacteroidia; o__Bacteroidales; f__[Barnesiellaceae]                   | 0.00606                                      |
| k__Bacteria; p__Bacteroidetes; c__Bacteroidia; o__Bacteroidales; f__Rikenellaceae                       | 7.36e-6                                      |
| k__Bacteria; p__Bacteroidetes; c__Bacteroidia; o__Bacteroidales; f__[Odoribacteriaceae]                 | 0.00087                                      |
| k__Bacteria; p__Verrucomicrobia; c__Verrucomicrobiae; o__Verrucomicrobiales; f__Verrucomicrobiaceae     | 3.93e-6                                      |
| k__Bacteria; p__Firmicutes; c__Clostridia; o__Clostridiales; f__EtOH8                                   | 0.60348                                      |
| k__Bacteria; p__Synergistetes; c__Synergistia; o__Synergistales; f__Synergistaceae                      | 0.24561                                      |
| k__Bacteria; p__Proteobacteria; c__Betaproteobacteria; o__Burkholderiales; f__Oxalobacteraceae          | 0.01552                                      |
| k__Bacteria; p__Firmicutes; c__Clostridia; o__Clostridiales; f__                                        | 9.29e-9                                      |
| k__Bacteria; p__Tenericutes; c__Mollucites; o__RF39; f__                                                | 0.00281                                      |
| k__Archaea; p__Euryarchaeota; c__Methanobacteria; o__Methanobacteriales; f__Methanobacteriaceae         | 0.00142                                      |
| k__Bacteria; p__Tenericutes; c__RF3; o__ML615J-28; f__                                                  | 0.00517                                      |
| k__Bacteria; p__Firmicutes; c__Clostridia; o__SHA-98; f__                                               | 0.00342                                      |
| k__Bacteria; p__Firmicutes; c__Clostridia; o__Clostridiales; f__Dehalobacteriaceae                      | 0.00336                                      |
| k__Bacteria; p__Firmicutes; c__Clostridia; o__Clostridiales; f__Christensenellaceae                     | 1.55e-9                                      |
| k__Bacteria; p__Bacteroidetes; c__Bacteroidia; o__Bacteroidales; f__Bacteroidaceae                      | 0.65799                                      |
| k__Bacteria; p__Proteobacteria; c__Betaproteobacteria; o__Burkholderiales; f__Alcaligenaceae            | 0.38689                                      |
| k__Bacteria; p__Bacteroidetes; c__Bacteroidia; o__Bacteroidales; f__Porphyromonadaceae                  | 0.00517                                      |
| k__Bacteria; p__Proteobacteria; c__Gammaproteobacteria; o__Enterobacteriales; f__Enterobacteriaceae     | 0.24790                                      |
| k__Bacteria; p__Actinobacteria; c__Actinobacteria; o__Bifidobacteriales; f__Bifidobacteriaceae          | 2.11e-5                                      |
| k__Bacteria; p__Firmicutes; c__Bacilli; o__Lactobacillales; f__Streptococcaceae                         | 0.64088                                      |
| k__Bacteria; p__Firmicutes; c__Clostridia; o__Clostridiales; f__Clostridiaceae                          | 0.64362                                      |
| k__Bacteria; p__Firmicutes; c__Clostridia; o__Clostridiales; f__Lachnospiraceae                         | 0.35217                                      |
| k__Bacteria; p__Firmicutes; c__Erysipelotrichi; o__Erysipelotrichales; f__Erysipelotrichaceae           | 0.99041                                      |
| k__Bacteria; p__Actinobacteria; c__Coriobacteriales; o__Coriobacteriales; f__Coriobacteriaceae          | 0.70082                                      |
| k__Bacteria; p__Verrucomicrobia; c__Opitutae; o__[Cericisococcaceae]                                    | 0.99041                                      |
| k__Bacteria; p__Lentisphaerae; c__[Lentisphaeria]; o__Victivallales; f__Victivallaceae                  | 0.00606                                      |
| k__Bacteria; p__Bacteroidetes; c__Bacteroidia; o__Bacteroidales; f__S24-7                               | 0.38689                                      |
| k__Bacteria; p__Bacteroidetes; c__Bacteroidia; o__Bacteroidales; f__Prevotellaceae                      | 0.21918                                      |
| k__Bacteria; p__Bacteroidetes; c__Bacteroidia; o__Bacteroidales; f__[Paraprevotellaceae]                | 0.96330                                      |
| k__Archaea; p__Euryarchaeota; c__Thermoplasmata; o__E2; f__[Methanomassiliicoccaceae]                   | 0.54235                                      |

Human Microbiome Project

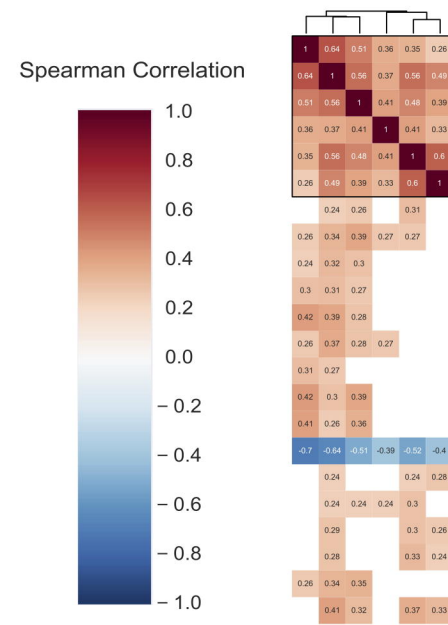

|                                                                                                     |         |
|-----------------------------------------------------------------------------------------------------|---------|
| k__Bacteria; p__Firmicutes; c__Clostridia; o__Clostridiales; f__Ruminococcaceae                     | 0.18789 |
| k__Bacteria; p__Firmicutes; c__Clostridia; o__Clostridiales; f__                                    | 0.00463 |
| k__Bacteria; p__Firmicutes; c__Clostridia; o__Clostridiales; f__Christensenellaceae                 | 0.00193 |
| k__Bacteria; p__Firmicutes; c__Clostridia; o__Clostridiales; f__Dehalobacteriaceae                  | 0.02336 |
| k__Bacteria; p__Tenericutes; c__Mollucites; o__RF39; f__                                            | 0.00718 |
| k__Bacteria; p__Tenericutes; c__RF3; o__ML615J-28; f__                                              | 0.08836 |
| k__Bacteria; p__Bacteroidetes; c__Bacteroidia; o__Bacteroidales; f__Prevotellaceae                  | 0.03608 |
| k__Bacteria; p__Firmicutes; c__Clostridia; o__Clostridiales; f__Peptococcaceae                      | 0.02300 |
| k__Bacteria; p__Firmicutes; c__Erysipelotrichi; o__Erysipelotrichales; f__Erysipelotrichaceae       | 0.23592 |
| k__Bacteria; p__Firmicutes; c__Clostridia; o__Clostridiales; f__Clostridiaceae                      | 0.23592 |
| k__Bacteria; p__Firmicutes; c__Clostridia; o__Clostridiales; f__Lachnospiraceae                     | 0.31072 |
| k__Bacteria; p__Verrucomicrobia; c__Verrucomicrobiae; o__Verrucomicrobiales; f__Verrucomicrobiaceae | 0.04723 |
| k__Bacteria; p__Firmicutes; c__Bacilli; o__Lactobacillales; f__Streptococcaceae                     | 0.57953 |
| k__Bacteria; p__Actinobacteria; c__Coriobacteriales; o__Coriobacteriales; f__Coriobacteriaceae      | 0.00660 |
| k__Bacteria; p__Firmicutes; c__Clostridia; o__Clostridiales; f__[Mogibacteriaceae]                  | 0.23592 |
| k__Bacteria; p__Bacteroidetes; c__Bacteroidia; o__Bacteroidales; f__Bacteroidaceae                  | 0.00629 |
| k__Bacteria; p__Lentisphaerae; c__[Lentisphaeria]; o__Victivallales; f__Victivallaceae              | 0.02558 |
| k__Bacteria; p__Proteobacteria; c__Betaproteobacteria; o__Burkholderiales; f__Oxalobacteraceae      | 0.18294 |
| k__Bacteria; p__Firmicutes; c__Clostridia; o__SHA-98; f__                                           | 0.59964 |
| k__Bacteria; p__Bacteroidetes; c__Bacteroidia; o__Bacteroidales; f__S24-7                           | 0.11834 |
| k__Bacteria; p__Bacteroidetes; c__Bacteroidia; o__Bacteroidales; f__Rikenellaceae                   | 0.00376 |
| k__Bacteria; p__Bacteroidetes; c__Bacteroidia; o__Bacteroidales; f__[Odoribacteriaceae]             | 0.00629 |

Christensenellaceae Relative Abundance

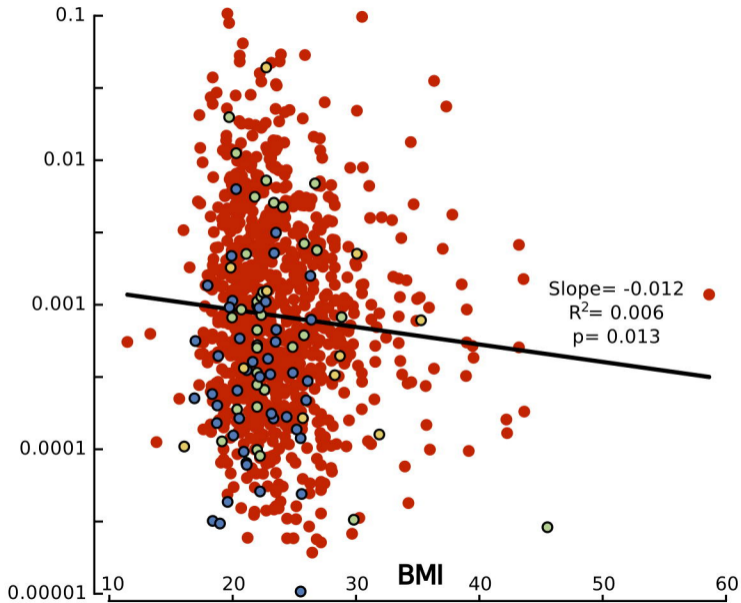

Source: https://www.biorxiv.org/content/10.1101/342915v1.full.pdf
